# Supplementary material
Source: PubMed Central journal article supplement (PMC8390923)
Supplement: mmc2.pdf [file mmc2.pdf]

# Role of spatial patterning of N-protein interactions in SARS-CoV-2 genome packaging

Ian Seim,<sup>1,2,3</sup> Christine A. Roden,<sup>1</sup> and Amy S. Gladfelter<sup>1,\*</sup>

<sup>1</sup>Department of Biology, <sup>2</sup>Curriculum in Bioinformatics and Computational Biology, and <sup>3</sup>Department of Applied Physical Sciences, University of North Carolina at Chapel Hill, Chapel Hill, North Carolina

**ABSTRACT** Viruses must efficiently and specifically package their genomes while excluding cellular nucleic acids and viral subgenomic fragments. Some viruses use specific packaging signals, which are conserved sequence or structure motifs present only in the full-length genome. Recent work has shown that viral proteins important for packaging can undergo liquid-liquid phase separation (LLPS), in which one or two viral nucleic acid binding proteins condense with the genome. The compositional simplicity of viral components lends itself well to theoretical modeling compared with more complex cellular organelles. Viral LLPS can be limited to one or two viral proteins and a single genome that is enriched in LLPS-promoting features. In our previous study, we observed that LLPS-promoting sequences of severe acute respiratory syndrome coronavirus 2 are located at the 5' and 3' ends of the genome, whereas the middle of the genome is predicted to consist mostly of solubilizing elements. Is this arrangement sufficient to drive single genome packaging, genome compaction, and genome cyclization? We addressed these questions using a coarse-grained polymer model, LASSI, to study the LLPS of nucleocapsid protein with RNA sequences that either promote LLPS or solubilization. With respect to genome cyclization, we find the most optimal arrangement restricts LLPS-promoting elements to the 5' and 3' ends of the genome, consistent with the native spatial patterning. Genome compaction is enhanced by clustered LLPS-promoting binding sites, whereas single genome packaging is most efficient when binding sites are distributed throughout the genome. These results suggest that many and variably positioned LLPS-promoting signals can support packaging in the absence of a singular packaging signal which argues against necessity of such a feature. We hypothesize that this model should be generalizable to multiple viruses as well as cellular organelles such as paraspeckles, which enrich specific long RNA sequences in a defined arrangement.

**SIGNIFICANCE** The COVID-19 pandemic has motivated research of the basic mechanisms of coronavirus replication. A major challenge faced by viruses such as SARS-CoV-2 is the selective packaging of a large genome in a relatively small capsid while excluding host and subgenomic nucleic acids. Genomic RNA of SARS-CoV-2 can condense with the nucleocapsid (N protein), a structural protein component critical for packaging of many viruses. Notably, certain regions of the genomic RNA drive condensation of N protein, whereas other regions solubilize it. Here, we explore how the spatial patterning of these opposing elements promotes single genome compaction, packaging, and cyclization. This model informs future *in silico* experiments addressing spatial patterning of genomic features that are experimentally intractable because of the length of the genome.

## INTRODUCTION

Biomolecular condensation is a simple and versatile way for cells to spatially and temporally control biochemistry. It is now clear that a wide variety of compartments likely form using the process of liquid-liquid phase separation (LLPS), which leads to a condensation of specific compo-

nents out of bulk cytosol or nucleoplasm (1). The protein components of condensates tend to contain intrinsically disordered or low-complexity sequences and RNA-binding domains (2). Many condensates also contain nucleic acids, and indeed, RNA can promote phase separation in many instances (3). However, the contributions of specific RNA sequences and structures in condensate assembly, contents, and material properties is poorly understood (3).

Viruses present a powerful system to examine sequence specificity for both proteins and nucleic acids in phase separation because of their highly compact genomes and

Submitted January 6, 2021, and accepted for publication June 18, 2021.

\*Correspondence: amyglad@unc.edu

Editor: Tamar Schlick.

<https://doi.org/10.1016/j.bpj.2021.06.018>

© 2021 Biophysical Society.

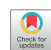

limited protein coding genes. Indeed, reports have emerged for vesicular stomatitis virus (VSV) (4), respiratory syncytial virus (5), rabies (6), measles (7), and HIV (8) components showing the capacity to undergo LLPS.

Severe acute respiratory syndrome coronavirus 2 (SARS-CoV-2) is a positive-strand RNA virus that has an exceptionally large genome of  $\sim 30$  kb, which is selectively packaged into a relatively small capsid estimated to be  $\sim 100$  nm in diameter (9). How the genome is selectively packaged while excluding subgenomic RNAs generated by the virus and the host transcriptome and sufficiently compressed to fit into a virion is not yet understood. The necessity of a packaging signal for SARS-CoV-1 is still not clear, although one sequence has been found to be sufficient, but not necessary, to package RNA (10). To our knowledge, no packaging signal has been identified for SARS-CoV-2.

The nucleocapsid protein of SARS-CoV-2 undergoes LLPS (11–15), and our work found that this occurs in an RNA-sequence-specific manner with different regions of the genome (11). Remarkably, RNAs of the same length can either promote or limit phase separation depending on the sequences. The sequences with differing behavior also show distinct patterns of binding of N protein, with LLPS-promoting sequences having discrete patterned N protein

interactions, whereas RNA sequences that limit phase separation are uniformly coated in N protein. The regions that promote phase separation are in the 5' and 3' ends of the genome, prompting us to speculate that phase separation could be relevant to packaging, as these LLPS-promoting sequences are present specifically on the whole genome and would not be together on subgenomic or host RNAs.

Here, we developed a coarse-grained model to test the hypothesis that phase separation could be a relevant process for selecting and compacting a single genome. Our goal was to examine how the linear location of different RNA sequences in the genome generates spatially segregated and condensed RNA molecules. We first explored fragments of the SARS-CoV-2 genome that have opposing phase behavior when mixed with N protein, as shown in (11). Specifically, the 5' and 3' ends of the genome promote phase separation, whereas the frameshifting element (FE) and central regions of the genome solubilize N protein (Fig. 1 A). We next examined the spatial patterning of these opposing elements within a full genome model and quantified its effects on phase separation, packaging of single genomes, genome compaction, and genome cyclization. We found that in this model, localization of LLPS-promoting features to the 5' and 3' ends of the genome is sufficient to drive

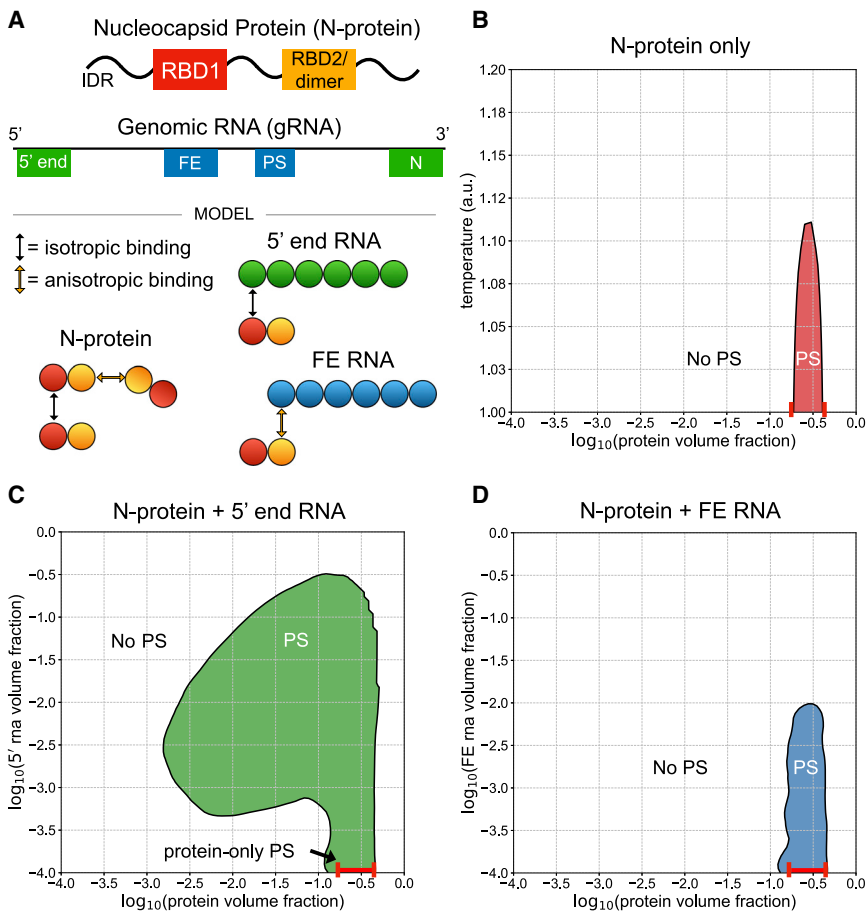

**FIGURE 1** 5' end and FE RNA with N-protein have opposing phase behavior. (A) N protein is represented as a two-bead chain, with the first bead participating in isotropic homotypic interactions and the second bead participating in anisotropic homotypic interactions. Both 5' end and FE RNA segments are roughly three times larger than N protein and are represented by six beads each. N-protein interacts with all 5' end RNA beads via isotropic binding with its first bead, and it interacts with all FE RNA beads via anisotropic binding with its second bead. This interaction with FE competes with N-protein dimerization. (B) N protein phase separates (PS in figure panel) in a narrow concentration and temperature range on its own. (C) N protein with 5' end RNA at temperature 1 au phase separates across a wider concentration range than on its own. (D) N protein with FE RNA at temperature 1 au is solubilized at sufficiently high FE RNA concentrations. To see this figure in color, go online.

LLPS-based single genome packaging and genome compaction and is necessary for genome cyclization. Addition of clustered LLPS-promoting features throughout the genome further enhanced all of these metrics.

## MATERIALS AND METHODS

### LASSI model parameterization

Simulations were performed using LASSI (LAttice simulation engine for Sticker and Spacer Interactions) (16) and run on the Longleaf computer cluster at the University of North Carolina-Chapel Hill and on the Comet Extreme Science and Engineering Discovery Environment (XSEDE) cluster at the San Diego Supercomputer Center (17). Each simulation was run independently on a single compute node with 4 GB random-access memory (RAM). The following default parameter sets were used for all simulations (Tables 1 and 2).

Negative energies indicate attraction and positive energies indicate repulsion. The appropriate subsets of these interactions were used for the simulations involving N protein alone, N protein and 5' end RNA, N protein and FE RNA, and all spatial rearrangements of beads in genomic RNA (gRNA) simulations. We performed parameter sweeps over many of these energies for the N-protein-only system, the 5' end and FE RNA fragments with N protein systems, and the N protein with gRNA systems, explained further in the main text and Figs. S2–S4, S7, and S8. Simulations of N protein alone were run at 15 temperatures linearly spaced between 1 arbitrary unit (au) and 2 au, and 15 concentrations logarithmically spaced between  $1e-4$  and  $1e-0.3$ , each for  $1e9$  total time steps with  $5e6$  time steps of thermalization. Temperature scales interaction energies,  $\epsilon$ , as  $\frac{\epsilon}{k_B}$ . During thermalization, the temperature is raised to 1000 au, anisotropic interactions are inactivated, and all chains are pushed to the center of the system, as described in (16). For systems with short chains, such as the six- and two-bead chains representing the 5' end and FE RNA fragments and N protein, respectively, this step allows for a more rapid convergence to equilibrium if the system will phase separate. For very long chains, this step may kinetically trap the system in a clustered state. For systems with N protein and 5' end and FE RNA fragments, simulations were run at a single temperature, 1 au, for  $1e9$  time steps and  $5e6$  steps of thermalization. For gRNA with N protein systems, simulations were run at a single temperature, 1 au, for  $10e9$  time steps with no thermalization because of kinetic trapping when thermalization was used. These simulations equilibrated to similar minimal energies with or without thermalization but had altered packaging properties (Figs. S5 and S6). We concluded that because gRNA chains in thermalized systems gradually disengaged from the initial central cluster over the course of simulations, their equilibrium states were not fully clustered at the center, as observed for simulations without thermalization (Fig. S5), and that they were instead kinetically trapped. Thus, we did not use thermalization for gRNA systems. For all ternary systems, concentrations of each component were chosen to be logarithmically spaced across the ranges of interest, with hundreds of ([protein], [RNA]) coordinates sampled for each system (Fig. S1). For N protein with 5' end and FE RNA, the maximal number of N-protein and RNA chains was used such that the total beads in the system never exceeded 40,000 and the target stoichiometries were satisfied. For simulations with gRNA and N protein,

10 gRNA molecules were always used, and the number of N-protein chains was altered to match target stoichiometries. At the lowest gRNA and highest N-protein volume fractions, the number of gRNA molecules was gradually scaled down to 1 because of computational limitations on the sizes of the systems. At each coordinate, two independent simulations were run with and without interactions, for a total of four simulations at each volume fraction coordinate.

### Simulation analysis

Analysis was performed using scripts within LASSI and custom scripts that relied upon the ovito python module (18). LASSI outputs a global density inhomogeneity value,  $\bar{\rho}$ , for each simulation, which is used to determine whether phase separation has occurred.  $\bar{\rho}$  is calculated using the pair distribution function for all beads in the system by default, as described in (16). We used this default calculation for N-protein-only systems and the 5' end and FE RNA fragments with N protein systems. However, for gRNA systems, we did not observe a dilute phase of gRNA chains and concluded that phase separation of gRNA in this context was not meaningful (more detail in the main text). Instead, we calculated a new density inhomogeneity metric,  $\bar{\rho}(N)$ , that uses the pair distribution function for only N-protein beads in the system. Using this limited pair distribution function, we calculated  $\bar{\rho}(N)$  analogously to  $\bar{\rho}$  as described in (16). Contours at  $\bar{\rho} = 0.025$  were used to determine phase boundaries for N-protein-only and 5' end and FE RNA fragment systems. This value of  $\bar{\rho}$  was shown in (16) to universally indicate the onset of phase separation. We used  $\bar{\rho}(N) = 0.02$  for gRNA systems because this value better aligned with sharp transitions in  $\bar{\rho}(N)$  as a function of volume fraction and resulted in smoother phase boundaries. We used the ovito module to calculate clusters using a maximal cutoff of  $3^{1/2}$ , the maximal distance between two interacting particles in a cubic lattice. The radius of gyration for each gRNA molecule was calculated according to the equation in the text. Ovito was also used to calculate end-to-end distances of genomic RNAs. We counted genomes as cyclized if their terminal beads were within  $3^{1/2}$  units of each other. For all analysis of packaging metrics in gRNA systems, 100 simulation snapshots were used from the last half of simulations for each of two runs and averaged over time and runs. Snapshots were recorded starting at  $5e9$  steps every  $5e7$  steps and used for analysis. For 5' end and FE RNA fragments with N protein systems, 50 simulation snapshots were recorded starting  $2e7$  steps after thermalization completion and used for analysis. For all systems,  $\bar{\rho}$  or  $\bar{\rho}(N)$  and clustering and packaging metrics were interpolated to a grid linearly spaced between  $1e-4$  and 1 with a discretization of 80 points along the protein and RNA axes. Interpolation was performed using `interpolate.griddata` from `scipy`. Plots were made using `matplotlib`.

## RESULTS

### Simulations recapitulate known phase behavior and binding patterns of N protein with FE and 5' end RNA

We first sought to characterize the phase behavior of different regions of the viral genome by focusing on

**TABLE 1** Isotropic binding energies

| Isotropic binding energies | RBD1 | RBD2-dimer | 5' end RNA | FE RNA | 5' gRNA terminus | 3' gRNA terminus |
|----------------------------|------|------------|------------|--------|------------------|------------------|
| RBD1                       | -0.5 | 0.0        | -1.2       | 0.0    | 0.0              | 0.0              |
| RBD2-dimer                 | 0.0  | 0.0        | 0.0        | 0.0    | 0.0              | 0.0              |
| 5' end RNA                 | -1.2 | 0.0        | 1.0        | 1.0    | 1.0              | 1.0              |
| FE RNA                     | 0.0  | 0.0        | 1.0        | 1.0    | 1.0              | 1.0              |
| 5' gRNA terminus           | 0.0  | 0.0        | 1.0        | 1.0    | 1.0              | 0.0              |
| 3' gRNA terminus           | 0.0  | 0.0        | 1.0        | 1.0    | 0.0              | 1.0              |

**TABLE 2** Anisotropic binding energies

| Anisotropic binding energies | RBD1 | RBD2-dimer | 5' end RNA | FE RNA | 5' gRNA terminus | 3' gRNA terminus |
|------------------------------|------|------------|------------|--------|------------------|------------------|
| RBD1                         | 0.0  | 0.0        | 0.0        | 0.0    | 0.0              | 0.0              |
| RBD2-dimer                   | 0.0  | -3.0       | 0.0        | -5.0   | 0.0              | 0.0              |
| 5' end RNA                   | 0.0  | 0.0        | 0.0        | 0.0    | 0.0              | 0.0              |
| FE RNA                       | 0.0  | -5.0       | 0.0        | 0.0    | 0.0              | 0.0              |
| 5' gRNA terminus             | 0.0  | 0.0        | 0.0        | 0.0    | 0.0              | -3.0             |
| 3' gRNA terminus             | 0.0  | 0.0        | 0.0        | 0.0    | -3.0             | 0.0              |

simulations involving N protein with either the first 1000 nucleotides of the genome (5' end RNA) or 1000 nucleotides around the frameshifting region located between open reading frame 1A and open reading frame 1B (FE RNA). Simulations were carried out using LASSI, which employs stickers-and-spacers representations of polymers and generates full phase diagrams by performing Monte Carlo simulations at many temperatures and volume fractions of components (16). Simulations take place on a cubic lattice, and only a single particle can occupy a given lattice site at one time. In this work, polymer beads are connected by implicit linkers that do not occupy space but rather guarantee that adjacent beads within chains are always in adjacent lattice sites. The first consideration was how to represent the N protein and RNA in a coarse-grained manner based on existing data. The N-protein has two RNA-binding domains (RBDs), a dimerization domain that overlaps with RBD2, and three intrinsically disordered regions (Fig. 1 A). RBD1 is conserved across multiple betacoronavirus genomes and has previously been shown to interact with the conserved sequences and structures in the 5' UTR (19). We previously demonstrated that a single point mutant within RBD1, Y109A, greatly reduces N-protein phase separation and changes N-protein interactions with 5' end RNA while only minimally affecting protein binding and phase behavior with FE RNA (11). Because FE RNA primarily solubilized N protein and deletion of the RBD2-dimerization domain blocked N-protein co-phase separation with RNA (12), we postulated that FE may block N-protein phase separation by specifically interacting with RBD2 and preventing N-protein dimerization. Thus, we hypothesize that N-protein RBD1 primarily binds to 5' end RNA, whereas RBD2 primarily binds to FE RNA.

Based on these data, we represented the N protein as simply as possible using two spheres. The first sphere participates in weak isotropic interactions with other N proteins (representing the association of the intrinsically disordered regions) and with the 5' end RNA (representing RBD1). The second sphere participates in strong anisotropic interactions with other N proteins to capture dimerization and the interaction with the FE RNA via RBD2 (Fig. 1 A). These latter anisotropic interactions operate under the assumption that N-protein dimerization competes with binding to FE RNA, as anisotropic binding in this model is one to one. To model charge effects, the RNA molecules experience an isotropic repulsive force among themselves, both within

chains and among distinct RNA chains. Using these specifications, we sought to qualitatively reproduce the phase behavior among these molecules established experimentally in (11). We found that, relative to N-protein phase separation on its own (Fig. 1 B), the addition of 5' end RNA promotes enhanced phase separation across a wide range of protein and RNA concentrations (Fig. 1 C), whereas the addition of FE RNA does not promote phase separation and solubilizes N protein at sufficiently high concentrations of RNA (Fig. 1 D).

In addition to opposing phase behavior, the binding of N protein to 5' end and FE RNA as a function of N-protein concentration was shown to be distinctly patterned based on protein cross-linking in (11). Whereas FE RNA is uniformly coated with protein across a wide range of protein concentrations, 5' end RNA has a few discrete binding sites and is only gradually coated more with protein as the protein concentration is increased. The simulations report a similar distinct pattern of protein interactions. For a fixed RNA volume fraction and at low bulk protein volume fractions, 5' end RNA is initially coated with very little protein (Fig. 2 A). As the bulk protein volume fraction is increased, 5' end RNA sharply transitions to binding large amounts of protein (Fig. 2 A). In contrast, FE RNA binds more protein at low protein volume fractions relative to 5' end RNA and experiences a more gradual transition to high amounts of bound protein (Fig. 2 B). In all, the distinct protein binding behavior of these two RNA elements is consistent with that found in (11) (Fig. 2 C). Thus, the simulation results are consistent with the experimental system and support that the coarse-grained representations and binding energies are reasonable approximations of the actual system.

We ran extensive parameter sweeps for these systems to determine the contributions of specific interactions. For N protein alone, the isotropic binding energy greatly influenced phase behavior (Fig. S2). Dimerization was necessary for phase separation for low isotropic binding energies, including the default energy used for all following simulations (Fig. S2). Interestingly, the strength of the dimerization interaction was nonmonotonically related to phase separation propensity, with very high dimerization energies starting to weaken phase separation (Fig. S2). We also studied the effects of altering the strength of binding between N protein and 5' end and FE RNA. The strength of the isotropic binding interaction between N protein and 5' end RNA strongly influenced co-phase behavior (Fig. S3). In contrast, the strength of



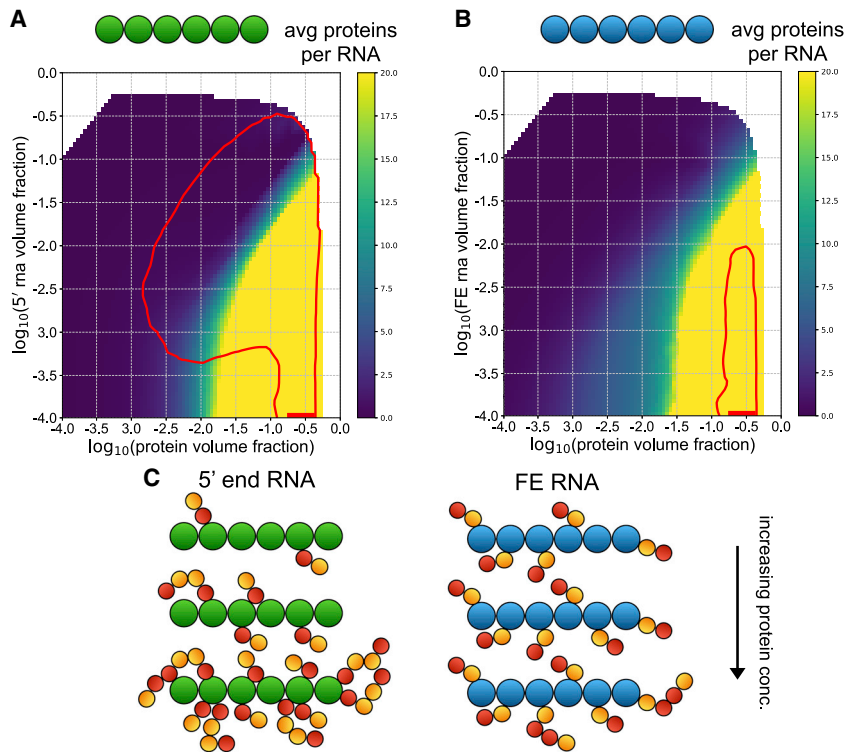

FIGURE 2 5' end and FE RNA have distinct N-protein binding behavior. (A and B) Phase boundaries for 5' end RNA with N-protein (A) and FE RNA (B) with N protein are shown in red. The heatmaps indicate the average number of protein chains per RNA chain for each cluster identified in each simulation. If more than one RNA chain is in a cluster, the ratio of protein chains/RNA chains within that cluster is reported. (C) For any given fixed RNA volume fraction, as the protein volume fraction is increased, 5' end RNA shows a sharp transition to highly bound protein, whereas FE shows a more gradual transition, with more proteins bound at low protein volume fractions relative to the 5' end system. To see this figure in color, go online.

the anisotropic binding between N protein and FE RNA did not alter phase behavior until very high energies, when a new arm of the phase diagram emerged (Fig. S3). We did observe differences in the average number of N proteins bound to FE outside of the phase envelope, with low anisotropic energies leading to less binding (Fig. S3). We doubled the magnitude of the RNA-RNA repulsive isotropic energy and observed small effects on the phase behavior of N protein with both 5' end RNA and FE RNA (Fig. S4). Finally, we increased the isotropic binding energy between N proteins and observed phase behavior in the context of 5' end and FE RNA. Because N protein alone phase separates across a wider range of volume fractions under this condition, we see a corresponding widening of the phase diagrams across these concentrations when mixed with both RNA fragments (Fig. S4). Additionally, more FE RNA is required to solubilize N protein because the N proteins are more stably phase separated (Fig. S4). The most sensitive interactions for these systems appear to be the isotropic binding between N proteins and the isotropic binding of N protein with 5' end RNA.

### Whole-genome simulations reveal effects of phase separation on single genome packaging, genome compaction, and genome cyclization

The large size (30 kb) of the genome makes it challenging to synthesize *in vitro* for experiments. We, therefore, were eager to use this simulation space to ask questions about how the different RNA-sequence elements will behave

when present *in cis* on the same polymer, as they are found in the native virus. To address whether specific arrangements of RNA encoded features could be sufficient for packaging a single genome, we utilized the same representations of the 5' end and FE RNA and the N protein described above and assembled a system that represents the N protein and the entire viral genome (gRNA) (Fig. 3 A). In addition to the 5' end of the gRNA, the 3' end was also found to promote phase separation with N protein and shared similar protein binding behavior and RNA sequence features (Fig. 1 A; (11)). Central regions of the gRNA that were studied behaved similarly to the FE RNA, and furthermore, the internal portions of the genome were predicted to be more similar to the FE than 5' end RNA (11). Taking into account the relative sizes of nucleotides and amino acids, the gRNA is roughly 90 $\times$  larger than N protein, so our representation involves 180-bead chains for each genome. An additional strong, anisotropic interaction between the terminal beads of each gRNA chain is added to represent known nucleotide complementarity between the 5' and 3' ends of the gRNA and the propensity to cross-link *in vivo* (20).

Because of the length of gRNA chains, we were only able to include 10 chains per simulation, with hundreds to thousands of N proteins. Interestingly, we did not observe dilute phases of gRNA chains under any conditions; there were no well-defined clusters including all gRNA chains, and instead, all gRNA chains were coated with N protein. N protein demonstrated a well-defined dilute phase and a dense phase on and around gRNA chains. For these reasons, we

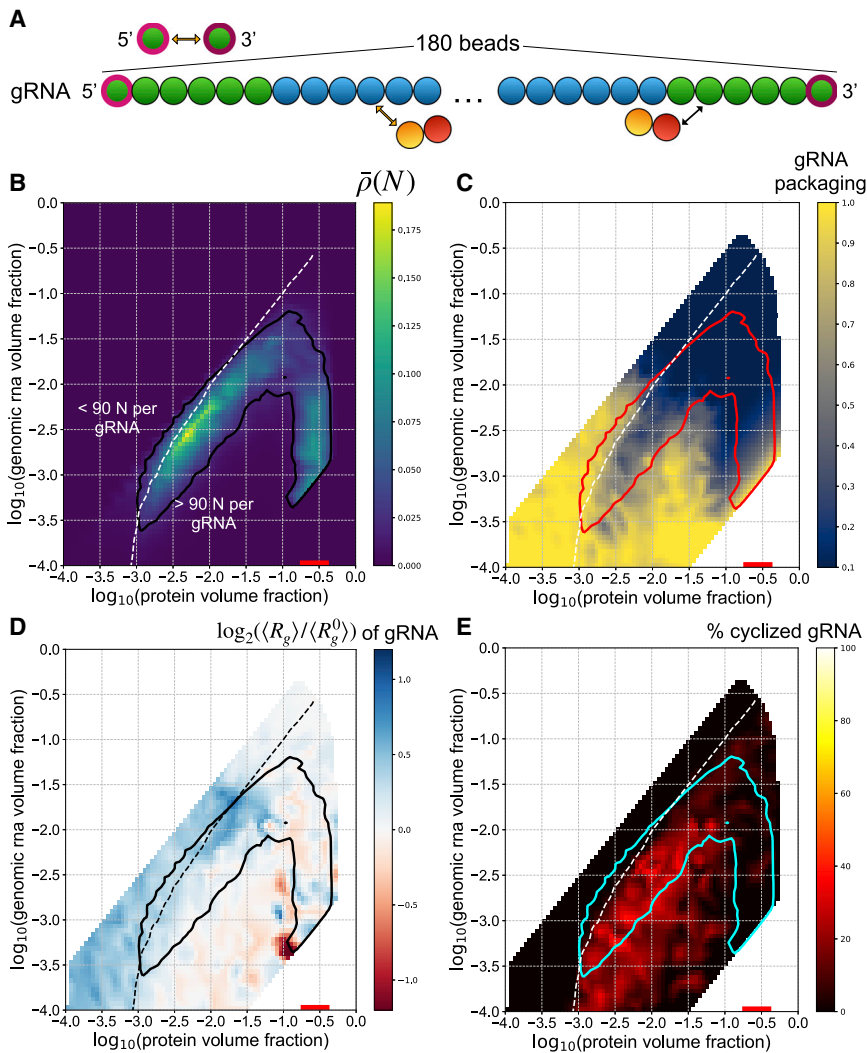

**FIGURE 3** N protein phase separates on gRNA, which limits single genome packaging but promotes genome compaction and cyclization. (A) Genomic RNA (gRNA) is represented as a chain with 180 beads. The terminal six beads on the 5' and 3' end are 5' end-like beads, and the rest are FE-like beads. An additional anisotropic interaction among the terminal beads is added to represent known nucleotide complementarity. (B) The phase boundary is drawn along the contour  $\bar{\rho}(N) = 0.02$  and is shown in black. The heatmap indicates the value of  $\bar{\rho}(N)$  at different volume fractions of N protein and gRNA. The white dotted line indicates the contour along which an equal volume fraction of N protein and gRNA is found within a given cluster, i.e., 90 N proteins for each gRNA. A heatmap indicating the average number of proteins bound to each gRNA is shown in Fig. S10. This contour is shown in all subsequent panels. (C) The phase boundary is shown in red. The heatmap shows the single gRNA packaging metric, which is the number of clusters containing gRNA divided by the total number of gRNA chains in each simulation. A value of 1 represents perfect single genome packaging. This metric is shown for an analogous system without attractive interactions in Fig. S9 A. (D) The phase boundary is shown in black. The heatmap shows the fold change of the average radius of gyration of gRNA chains, over the average radius of gyration of gRNA in a system without attractive interactions,  $\langle R_g^0 \rangle$ . A phase diagram with a heatmap of  $\langle R_g^0 \rangle$  is shown in Fig. S9 B. (E) The phase boundary is shown in cyan. The heatmap shows the percentage of cyclized genomes. Each gRNA chain is categorized as cyclized if its terminal beads are in adjacent lattice positions. To see this figure in color, go online.

determined that phase separation of gRNA in this context was not well defined and regarded gRNA instead as a surface upon which N-protein phase separation occurred. To quantify this behavior, we altered the definition of the density inhomogeneity metric,  $\bar{\rho}$ , originally defined as a function of the pair distribution functions between all beads in a given simulation as explained in (16). Because we observed a density transition only of N protein in gRNA-containing systems, we defined a new metric,  $\bar{\rho}(N)$ , which depends only on the pair distribution function of N proteins in the system. Thus, the following phase diagrams describing gRNA-containing systems are no longer ternary phase diagrams as in Figs. 1 and 2 with well-defined dilute phases of both components. They instead indicate the density inhomogeneity of N protein as a function of the volume fraction of N protein and the surface upon which they condense, gRNA.

For a given N-protein concentration, phase separation of N protein in the gRNA system occurs over a smaller range of RNA concentrations relative to the 5' end system (Figs.

1 C and 3 B). This result is consistent with experiments in which 5' end and FE RNAs were combined in *trans*, which led to more limited phase separation compared to 5' end RNA alone (11). However, phase separation of N protein can occur at lower volume fractions of N protein and gRNA because of the length of the gRNA chains, which is also consistent with experiments that were performed with RNA purified from infected cells that contained gRNA (11). We quantified the average amount of protein bound to single genomes and found that the contour delineating an equal volume fraction of protein and gRNA per cluster aligns well with the high-RNA volume fraction edge of the phase envelope (white dotted line, Fig. 3 B). The area to the right of this contour indicates bulk concentrations of N protein and gRNA that lead to a majority of volume fraction per cluster occupied by N protein. This region includes almost all of the phase-separating regime and likely captures the most relevant stoichiometries of gRNA and N protein during infection in host cells and virion assembly (10).

During virion assembly, single genomes must be packaged within a capsid built of structural proteins and N protein (21), so we also quantified how many gRNA chains were in each phase-separated cluster. We defined a simple metric to quantify single gRNA packaging; the number of gRNA-containing clusters in the system is divided by the total number of gRNA chains. Therefore, the metric is 1 when single genome packaging is perfect and approaches 0 as multiple genomes are clustered together. A zeroth-order effect due to excluded volume in the absence of other interactions is shown in Fig. S9 A and demonstrates that single packaging becomes impossible with prohibitively high volume fractions of N protein or gRNA. In the presence of interactions, our analysis indicates that, for the most part, N-protein phase separation hinders packaging of single gRNAs in clusters (Fig. 3 C). However, at higher N-protein volume fractions in the concave region below the phase envelope, single packaging is robust. It appears that coexisting phases of N protein condensed on gRNA and a dilute phase in solution promotes clustering of gRNA, but that a more uniform, high density of N protein throughout the system effectively keeps gRNA chains separated.

If arranged linearly, the  $\sim 30$  kb genome has an end-to-end length of roughly 10,000 nm. However, during virion assembly, this genome must be packaged into a viral particle with a diameter of  $\sim 100$  nm, representing an immense compaction challenge. We reasoned that N-protein binding could provide a simple mechanism for gRNA compaction. To quantify compaction, we measured the average radius of gyration of gRNA in each simulation (22),

$$R_g^2 = \frac{1}{N} \sum_{k=1}^N \left( \vec{r}_k - \vec{r}_{mean} \right)^2,$$

where  $N = 180$  is the number of monomers in a chain,  $\vec{r}_k$  is the position of monomer  $k$ , and  $\vec{r}_{mean}$  is the average position of monomers in the chain.  $R_g$  is computed for each gRNA in a simulation, and the average across gRNAs,  $\langle R_g \rangle$ , is reported for each simulation. Again, there is an effect due solely to excluded-volume interactions that leads to compaction of gRNA chains under more crowded conditions (Fig. S9). Therefore, we evaluated the effects of N-protein binding interactions using the fold change in the radius of gyration in simulations with interactions relative to those without interactions,  $\log_2(\langle R_g \rangle / \langle R_g^0 \rangle)$ . We found that N-protein binding indeed leads to more compact genomes to the right of the equal protein-gRNA volume fraction contour (*dotted white line*) and more extended genomes to the left of it (Fig. 3 D). As seen with the single genome packaging metric, the most robust compaction occurs in the concave region of the phase diagram with a high N-protein density (Fig. 3 D).

Genome cyclization is important for replication of many RNA viruses (23), and there is recent in vivo evidence of

cyclization of the SARS-CoV-2 genome (20). We thus sought to characterize the potential role of phase behavior in genome cyclization in our model. We hypothesized that the similar RNA features at the 5' and 3' ends of the genome would promote cyclization when facilitating phase separation of N-protein. We defined a cyclized genome as one whose terminal beads occupy adjacent lattice sites. Averaging over the final half of each simulation, we quantified the percentage of genomes that met this criterion. Strikingly, we see that up to 40–50% of genomes are cyclized for volume fractions to the right of the equal N protein-gRNA volume fraction contour and within the phase boundary (Fig. 3 E). Thus, it appears that sufficient binding of N protein is essential for cyclization of gRNA molecules, with phase separation providing additional efficiency.

We also performed parameter sweeps for this gRNA-containing system, focusing on the two most sensitive interactions identified in the N protein with 5' end and FE RNA parameter sweeps; these are the isotropic interaction between N protein and 5' end RNA and the isotropic interaction between N proteins. With an increased binding energy between N protein and the 5' end RNA beads in the gRNA, we saw a modest extension of the phase boundary (Fig. S7 A). Single genome packaging (Fig. S7 B) and compaction (Fig. S7 C) are relatively unaffected with respect to wild-type (WT), but surprisingly, cyclization is much less efficient (Fig. S7 D). It appears that although N-protein binding to the ends of gRNA chains can facilitate their collocation, very strong binding may limit the ability of the ends of the gRNA chains to come into contact because of interference from N protein. For the system with increased isotropic interactions among N proteins, we observed a widening of the phase boundary corresponding to the broader range of volume fractions over which N protein alone phase separates under this condition (Fig. S8). Single genome packaging is unaffected (Fig. S8 B), compaction is minimally enhanced in the concave region below the phase envelope (Fig. S8 C), and genome cyclization is unaffected (Fig. S8 D).

### Maximal 5' end-like RNA content in gRNA chains leads to optimal packaging

Our previous work experimentally examined relatively small regions of the genome with regard to the ability to promote N-protein phase separation. Although it was clear that the 5' and 3' ends of the genome were both highly structured and this was associated with LLPS-promoting activity, it was less definitive that most of the interior of the genome was most similar to FE. Therefore, we next asked how the total LLPS-promoting content versus the solubilizing RNA content altered N-protein phase separation and genome packaging. We created gRNA chains composed entirely of either 5' end-like beads or FE-like beads (Fig. 4 A). We found that a genome of purely 5' end-like

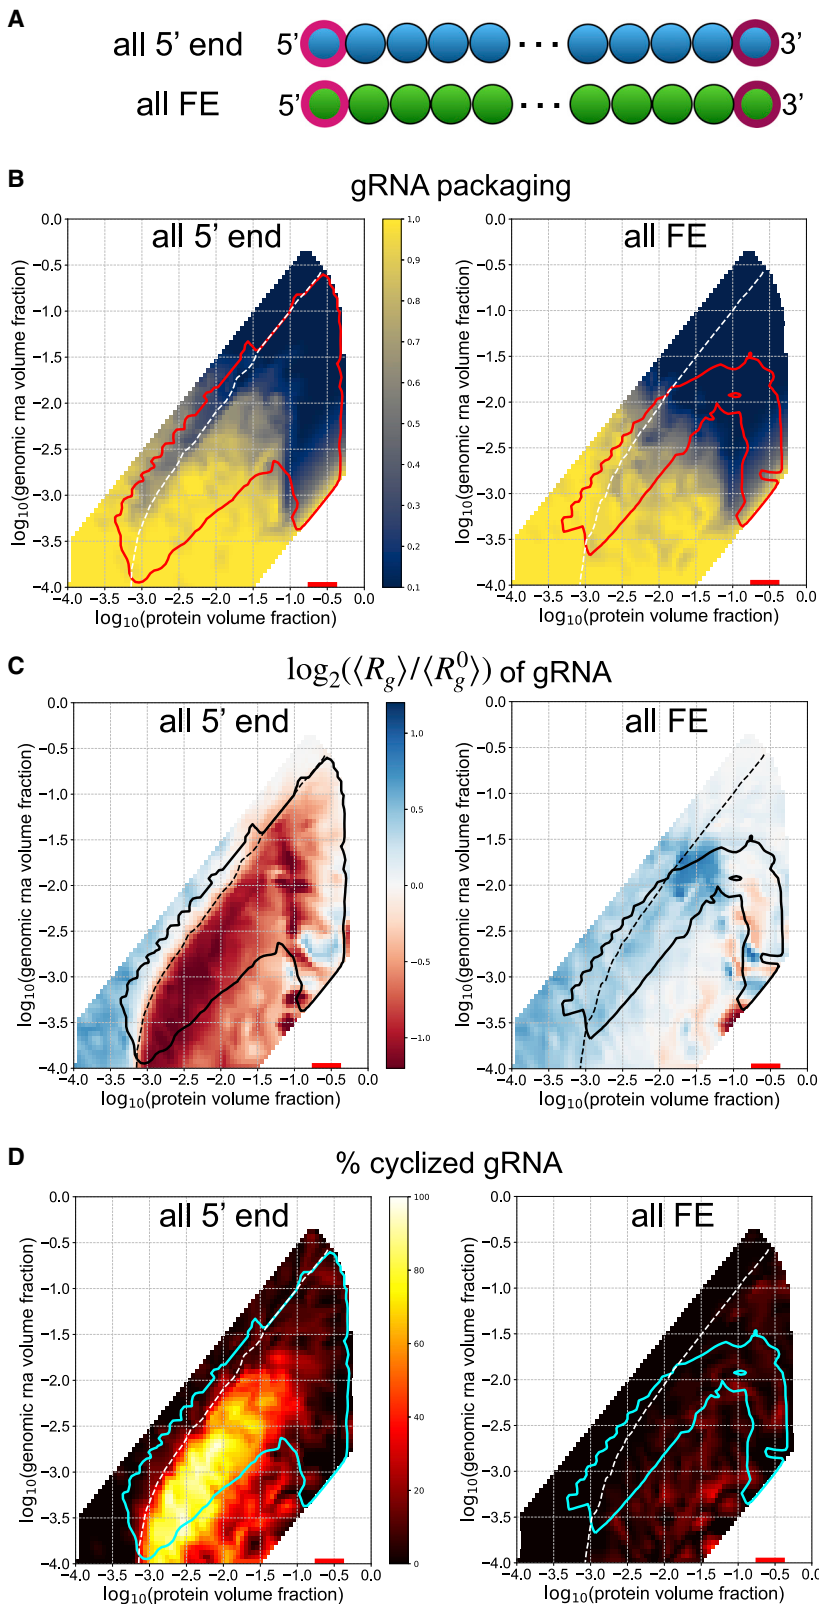

FIGURE 4 LLPS-promoting sites enhance genome packaging. (A) Schematic showing gRNA chains with only 5' end-like beads and only FE-like beads. (B) The phase boundaries are shown in red. Heatmaps show the single genome packaging metric for each gRNA mutant. (C) The phase boundaries are shown in black. Heatmaps show the fold change in radius of gyration for each gRNA mutant. (D) Phase boundaries are shown in cyan. Heatmaps show the genome cyclization metric for each gRNA mutant. To see this figure in color, go online.

beads led to greatly enhanced phase separation of N-protein (Fig. 4 B), robust gRNA compaction below the equal volume fraction contour (Fig. 4 C), and nearly perfect genome

cyclization below the equal volume fraction contour and within the phase envelope (Fig. 4 D). In contrast, gRNA composed entirely of FE beads limited single packaging at



high volume fractions of N protein and gRNA (Fig. 4 B), led to gRNA expansion for most conditions (Fig. 4 C), and did not promote genome cyclization (Fig. 4 D). It appears that maximal content of LLPS-promoting sequence is ideal for packaging gRNA by N protein alone. However, the genome must encode many features other than optimal binding with N protein and is thus constrained to have a limited amount of LLPS-promoting sequence. Given a limited supply of LLPS-promoting sequence, we next asked what the optimal spatial patterning would be to promote packaging.

### Spatial patterning gRNA mutants can enhance single genome packaging but limit compaction and prevent genome cyclization

Because the 5' and 3' ends of the gRNA were both found to promote phase separation with N protein, we hypothesized that this spatial arrangement of phase-separation-promoting elements at the ends of the genome may be relevant to packaging. We investigated the importance of the arrangement of phase-separation-promoting sequences on the ends of the gRNA by designing mutants in which these regions are rearranged. We created three mutants, all of which retain 12 5' end-like beads and the anisotropic interaction among their terminal beads. The 5' end-like beads are repositioned either in the middle of the genome (middle), uniformly throughout (uniform), or on one end (end) (Fig. 5 A). The phase boundaries of each of the mutants remain relatively unchanged with respect to the WT system, suggesting that the total amount, and not the spatial patterning of 5' end and FE RNA beads, determines the bulk volume fractions at which N-protein phase separation occurs (Fig. 5). However, we observed differences in the genome packaging metrics relative to WT and among the mutants.

The uniform and middle gRNA systems are more efficient than WT at packaging single genomes into clusters, and end gRNA behaves similarly to WT (Fig. 5 B). Thus, it appears that dispersed or centrally located phase-separating elements within the gRNA are preferred for single genome packaging by N-protein alone. However, uniform gRNA does not significantly compact upon phase separation, whereas middle and end gRNA compact similarly to WT, suggesting that sufficiently clustered LLPS-promoting sequences are important for compaction (Fig. 5 C).

Given the positioning of the WT LLPS-promoting sequences at the ends of the genome, we postulated that rearrangement of the location of these sequences would have the strongest impact on genome cyclization. To this end, we also quantified genome cyclization for these mutants and found that none of them were able to cyclize genomes (Fig. 5 D). Importantly, each of these systems maintains an intrinsic bonding capability between the terminal beads of its gRNA chains. However, because the chains are so large, they cannot efficiently locate each other during the course of

the simulation. Thus, the localization of phase separation to the 5' and 3' ends with N-protein in the WT system is necessary for the positioning of the genome ends for binding and cyclization (Figs. 3 E and 5 D).

### Optimal gRNA design with limited LLPS-promoting sequence

We know from the studies above that increased 5' end-like RNA content enhances all packaging metrics. With a limited supply, it appears that positioning of these beads at the ends of genome is essential for cyclization, clustered beads are important for compaction, and uniformly spaced or centrally located beads can promote single packaging. With this understanding, we hypothesized that a genome could evolve that would optimally function according to all of these metrics, given a limited supply of LLPS-promoting beads. We designed a gRNA that has the WT arrangement at the ends, with 12 additional groups of three 5' end-like beads uniformly spaced throughout its length (Fig. 6 A). We found that N-protein phase separation occurs over a broader range of concentrations and that all studied genome packaging metrics are enhanced relative to WT. Single genome packaging is more preferable within the concave region below the phase envelope (Fig. 6 B). Genome compaction is greatly enhanced below the equal N protein-gRNA volume fraction contour (Fig. 6 C). Genome cyclization is also enhanced (Fig. 6 D).

For this optimized gRNA design, there appears to be a concentration regime corresponding to the concave region below the phase envelope where single genome packaging, compaction, and cyclization can all occur efficiently. These results raise two predictions concerning the SARS-CoV-2 virion assembly process. First, there exists an optimal concentration range of gRNA and N protein that promotes virion assembly. Indeed, a sufficiently high protein/RNA ratio has been shown to be necessary for self-assembly of viral capsids *in vitro* (24). Second, phase-separation-promoting gRNA sequences may be not only located at the 5' and 3' ends but also distributed in clusters throughout the genome to enhance genome packaging.

## DISCUSSION

It is clear that protein and RNA elements of SARS-CoV-2 can engage in phase separation with N protein (11–15), but the functional consequences of this physical chemistry capacity for viral replication remain elusive. In this study, we sought to explore how the spatial patterning of phase-separation-promoting or inhibiting RNA elements in the genome could facilitate the specificity and singularity of packaging the genome. Using coarse-grained simulations rooted in empirical observations, we find that single genome packaging is most efficient when binding sites are centrally located or distributed throughout the genome. However, the

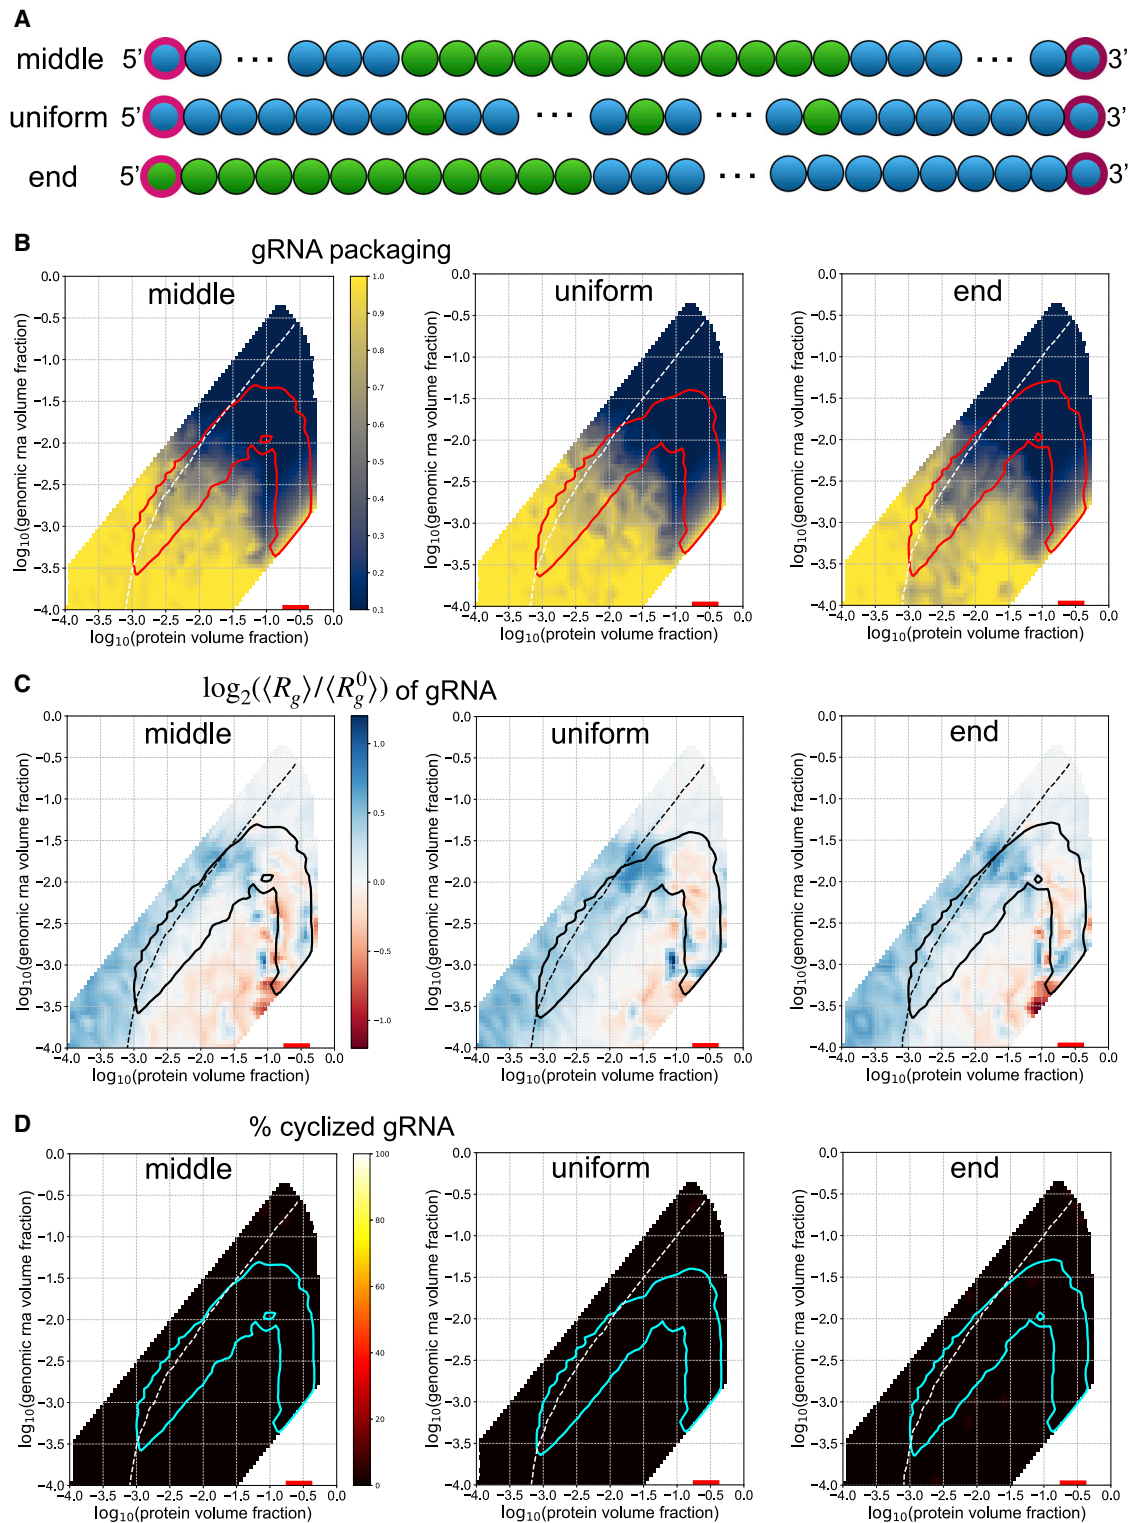

**FIGURE 5** Spatial patterning gRNA mutants show altered genome packaging metrics. (A) Three spatial patterning genome mutants were constructed. Each mutant retains the same number of 5' end-like and FE-like beads as in WT. The terminal beads maintain their anisotropic interaction, regardless of their identity as 5' end like or FE like. (B) Phase boundaries are shown in red for each spatial patterning mutant system. The white dotted line indicates the contour along which an equal volume fraction of N protein and gRNA is found within a given cluster and is included in all subsequent panels. The heatmaps show the single gRNA packaging metric. (C) Phase boundaries are shown in black. The heatmaps show the fold change in the average radius of gyration of gRNA chains. (D) Phase boundaries are shown in cyan. The heatmaps show the percentage of cyclized genomes. To see this figure in color, go online.

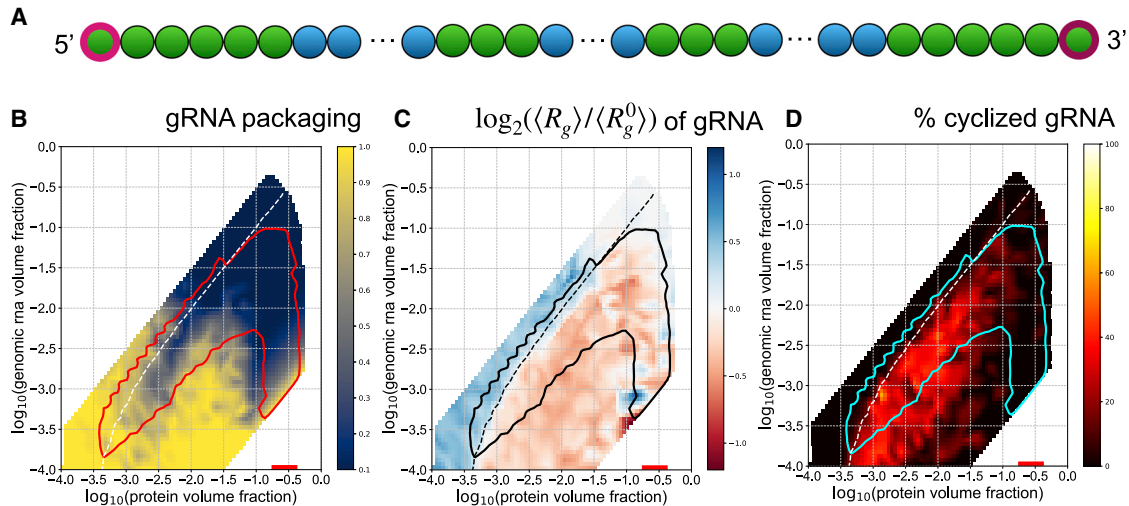

**FIGURE 6** WT and uniform elements optimize genome packaging when combined. (A) The optimal gRNA pattern for singular and compact packaging has six 5' end-like beads at each end, with 12 additional groups of three 5' end-like beads distributed uniformly throughout the rest of the chain. (B) The phase boundary is shown in red. The white dotted line indicates the contour along which an equal volume fraction of N protein and gRNA is found within a given cluster and is included in all subsequent panels. The heatmap shows the single gRNA packaging metric. (C) The phase boundary is shown in black. The heatmap shows the fold change of the average radius of gyration of gRNA chains relative to a system with only excluded-volume interactions. (D) The phase boundary is shown in cyan. The heatmap shows the percentage of cyclized genomes. To see this figure in color, go online.

arrangement of phase-separation-promoting sequences in clusters is critical for genome compaction, and the positioning of these elements at both ends is necessary for cyclization.

### Robustness of the model

The model of N-protein interactions with the gRNA fragments, 5' end and FE RNA, was constructed to recapitulate several features of the experimentally characterized system. Importantly, we recover the following features: N protein dimerizes and phase separates weakly on its own (Fig. 1 B), N-protein phase separation is enhanced when mixed with 5' end RNA (Fig. 1 C), N protein is dissolved when mixed with sufficient amounts of FE RNA (Fig. 1 D), and the binding patterns of N protein on both 5' end and FE RNA in the dilute phase are qualitatively consistent with those measured experimentally (Fig. 2). These behaviors arise because of the choice of the class of interactions among components, either isotropic or anisotropic. A key prediction of this model is that 5' end RNA promotes co-phase separation with protein using isotropic interactions by allowing for large-scale interaction networks to form, whereas FE RNA abrogates phase separation by clustering N protein into small, inert protein-RNA complexes via anisotropic interactions. These choices led to phase behavior and dilute phase properties that were consistent with experimental results and are a central prediction of this work. We performed a wide range of parameter sweeps over the binding energies for each of these interactions in Figs. S2–S4 and found that the important features recovered are robust to changes in magnitude of binding energies; rather, the class of inter-

action (isotropic versus anisotropic) is what defines the behavior in these systems.

### Biophysical interpretation of the different protein binding modes leading to opposing phase behavior

An essential feature of our model is the different binding modes of N protein with 5' end and FE RNA. We found that weak, isotropic interactions with 5' end RNA promote phase separation, whereas strong, anisotropic interactions with FE RNA lead to N-protein solubilization. Intrinsically, the valence of the isotropic interactions is 26 in a cubic lattice, whereas the valence is 1 for the anisotropic interactions. Additionally, because the anisotropic interactions have a higher binding energy than the isotropic ones, they last for longer, which effectively compounds the difference in valence between the 5' end and FE beads. For the FE RNA system, this design allows for more N-protein binding at lower protein concentrations but a less significant increase in protein binding as the protein concentration is increased. On the other hand, 5' end RNA experiences a cooperative binding effect with N protein, leading to greatly increased protein binding as protein concentrations are increased. The valence difference between 5' end and FE RNA also includes competition between N protein-FE RNA binding and N-protein dimerization, as a single bead in the model is responsible for both interactions. Therefore, when N protein is bound to FE RNA, it can no longer dimerize, but when it is bound to 5' end RNA, it is free to dimerize. We suspect that this competition also compounds the cooperative effect of the N-protein binding to each of these different RNAs and

contributes to the distinct behaviors of these different polymers. The agreement between experimental results and our model suggests that there may be some underlying differences in the N protein-RNA interactions in the 5' end-like and FE-like regions in the gRNA that lead to distinct protein binding behavior. We hypothesize that FE-like regions have different N-protein binding kinetics than 5' end-like regions, which will need to be explored experimentally in future work.

### Boomerang shape of the phase boundaries

It has been previously reported that phase boundaries in ternary systems that are purely driven by heterotypic interactions are roughly elliptical in log-log space (16). However, the phase diagrams of the ternary systems studied in this work have distinct shapes. The 5' end RNA with N-protein phase diagram resembles an elliptical shape combined with a high N-protein concentration arm that corresponds well to the shape of the FE RNA with N-protein phase diagram. Each of these high N-protein concentration arms correspond to the N-protein concentration range where phase separation occurs for N-protein alone at temperature 1 au, the temperature at which all ternary systems were studied (Fig. 1, B–D). The same superimposed shape is even more apparent in the gRNA with N-protein phase diagrams, with N-protein phase boundaries that resemble boomerangs (Fig. 3, B–E). We hypothesize that these phase diagrams arise from the union of two regimes of phase behavior that are driven by distinct forces. The elliptical portion that extends to low N-protein and RNA concentrations demonstrates phase separation that is driven by heterotypic interactions between RNA and N protein, which aligns with reports in (16). On the other hand, the high-concentration N-protein portion of the phase diagrams indicates phase separation that is driven by N-protein homotypic interactions. Here, RNA can partition into the dense phase, but it is neither necessary for phase separation nor the driver. Therefore, the FE RNA with N-protein phase diagram consists only of this high N-protein concentration regime, which is eventually capped at high enough RNA concentrations (Fig. 1 D). Because more FE RNA is present to sequester N protein out of solution, the concentration of the available pool of N protein is effectively decreased, and phase separation can no longer occur. For systems with 5' end RNA present, the phase diagrams have a complex reentrant character, passing in and out of the phase-separating regime for certain fixed RNA concentrations as N-protein concentration is changed (Figs. 1 C and 3, B–E). We speculate that this reentrant behavior is due to the interplay of phase separation driven by heterotypic or homotypic interactions, with intermediate regimes in which neither are strong enough to drive phase separation. It is interesting to speculate whether such rich phase behavior may exist in other multicomponent systems, specifically those that

involve long nucleotide polymers and RNA- or DNA-binding proteins.

### Compatibility with the single packaging signal model

A recent model of single genome packaging has emerged as part of a study of the SARS-CoV-2 N protein (13). Results from Cubuk et al. suggest genomes with a single packaging signal are much more efficiently packaged, and multiple viruses such as HIV employ this strategy (13). Our results confirm this finding in that restriction of LLPS-promoting elements to the ends of the genome (Fig. 5) is not as efficient as a single central packaging signal and multiple peppered LLPS-promoting elements in the center (Fig. 6). Cubuk et al. showed that for a two-bead representation of N protein that experienced isotropic attraction to itself and a long, 61-bead RNA molecule, large phase-separated clusters would form (13). However, if a much stronger binding site were added to the center of the RNA chain, mimicking a hypothetical packaging signal, N-protein and RNA chains would instead form kinetically trapped clusters that only very slowly coalesced into a single phase-separated droplet. This model is simpler than the one presented here, but it is reminiscent of the distinct effects seen here between 5' end RNA and FE RNA. In our model, the most important effective difference between the 5' end and FE RNA beads is their valence, with 5' end RNA having a much higher valence than FE RNA. The model in (13) includes only a difference in binding energy, as all beads interact isotropically. However, the higher binding energy beads have a lower effective valence than the low energy beads at a given timescale, as they participate in bonds with fewer partners. In line with our results, the presence of lower-valence binding sites sequesters N protein into clusters, opposing large-scale phase separation. Indeed, other groups have shown that a high enough valence is required for phase separation to occur *in silico* (25) and *in vitro* (26). In our model, however, most of the binding sites on the gRNA are of a low-valence character, which is distinct from the single, low-valence, packaging signal site in (13). Despite this difference, both models provide evidence that such low-valence sites are essential for packaging tasks required during virion assembly and that runaway phase separation must be tempered via alternative self-assembly pathways.

Why would SARS-CoV-2 and other betacoronaviruses use a relatively inefficient packaging methodology with LLPS? One possible reason could be that packaging and condensation may be acting in direct competition with other viral processes such as translation, and N-protein LLPS may block or slow ribosomal readthrough. In line with this hypothesis, Fmr1 LLPS has previously been demonstrated to repress translation of co-condensing RNA (27). By restricting LLPS-promoting elements to the 5' and 3' ends of the genome, SARS-CoV-2 could allow for efficient packaging



while ensuring viral protein production can proceed unencumbered.

### The phase behavior of systems with very short and very long chains

For our systems with N-protein and gRNA, we never observed a dilute phase of gRNA and instead saw that the dense phase of N-protein was condensed on gRNA chains. We hypothesize that this effect is due to the large size of gRNA and their low abundance (10 chains in simulations). The Flory-Huggins free energy (28) predicts that as polymer length increases, the dilute phase volume fraction of that polymer decreases. As chain length increases in a fixed volume, the expected dilute phase volume fraction will eventually pass below the volume fraction occupied by a single chain, leading to disappearance of the dilute phase. When a small number of such large chains are combined with many thousands of shorter chains, an interesting blend of properties can arise. The shorter chain may still exhibit thermodynamically well-defined phase separation, although the dense phase now occurs on the long chains which effectively become a surface upon which phase separation is favored. This situation may be a relatively common one in biology. For example, within a host cell, the number of SARS-CoV-2 gRNA chains in a volume relevant for N-protein phase separation may not be much more than the 10 studied here (9). The difference in scale between thousands of proteins and dozens of very large nucleic acid polymers presents challenges to existing physical frameworks for ternary phase separation and will require theoretical innovations to rigorously understand.

### Generalization to other viruses and systems with long RNAs or DNA

Our models developed here are sufficiently coarse grained to speculate that they may be applicable to other viruses and systems that involve long nucleotide chains and proteins. Components from several viruses have been shown to undergo phase separation, raising the possibility that spatial patterning of specific LLPS-promoting RNA or DNA sequences may have evolved to promote optimal genome packaging in other viruses in addition to SARS-CoV-2.

Many cellular-phase-separated bodies involve long RNAs or DNA and proteins that bind them. A particularly relevant example for our modeling is paraspeckles. Paraspeckles are highly ordered, condensed nuclear bodies that require the presence of the long noncoding RNA, NEAT1. NEAT1 was recently shown to contain distinct functional domains, one of which is repetitive in its sequence and is necessary for paraspeckle formation (29). Paraspeckles also require several proteins, most of which contain RNA-binding domains and disordered regions (30). Recent work has shown

that the central region of NEAT1 is necessary and sufficient for paraspeckle formation and that it initiates assembly by binding several proteins (29). Specifically, the proteins NONO and SPFQ must first bind NEAT1, dimerize, and promote further polymerization via coiled-coil domains with other proteins for paraspeckle assembly to continue (30). There are thus many parallels with the SARS-CoV-2 system studied here; specific spatial patterning of protein binding elements along the RNAs is essential, and the protein partners must be able to dimerize or oligomerize for further assembly.

## CONCLUSION

Identification of specific RNA sequences that promote ordered phase-separated bodies via protein binding will advance not only our understanding of viruses but also of the many diverse cellular bodies and regions that contain long RNAs or DNA.

## SUPPORTING MATERIAL

Supporting material can be found online at <https://doi.org/10.1016/j.bpj.2021.06.018>.

## AUTHOR CONTRIBUTIONS

I.S., A.S.G., and C.A.R. designed the conceptual models. I.S. implemented and performed simulations, data analysis, and created figures. I.S., A.S.G., and C.A.R. wrote the manuscript.

## ACKNOWLEDGMENTS

We thank Mikayla Feldbauer for helpful discussions and code drafting, the Pappu lab for initial introductions to working with LASSI, and Furqan Dar for technical guidance when modifying LASSI. This work used the XSEDE, which is supported by National Science Foundation grant number ACI-1548562. The Comet cluster at the San Diego Supercomputer Center was used through allocation nca106. We thank UNC Chapel Hill campus champion Mark Reed for helping I.S. access XSEDE resources on short notice. This work was supported by a FastGrant to A.S.G. C.A.R. is supported by National Institutes of Health T32 CA 9156-43 and F32GM136164 and L'OREAL USA for Women in Science Fellowship, and I.S. and A.S.G. were supported by National Institutes of Health R01 GM081506 and the Air Force Office of Scientific Research (grant FA9550-20-1-0241). A.S.G. serves on the scientific advisory board to Dewpoint Therapeutics.

## REFERENCES

1. Boeynaems, S., S. Alberti, ..., M. Fuxreiter. 2018. Protein phase separation: a new phase in cell biology. *Trends Cell Biol.* 28:420–435.
2. Brocca, S., R. Grandori, ..., V. Uversky. 2020. Liquid-liquid phase separation by intrinsically disordered protein regions of viruses: roles in viral life cycle and control of virus-host interactions. *Int. J. Mol. Sci.* 21:9045.
3. Roden, C., and A. S. Gladfelter. 2021. RNA contributions to the form and function of biomolecular condensates. *Nat. Rev. Mol. Cell Biol.* 22:183–195, Published online July 6, 2020.

4. Heinrich, B. S., Z. Maliga, ..., S. P. J. Whelan. 2018. Phase transitions drive the formation of vesicular stomatitis virus replication compartments. *MBio*. 9:e02290-17.
5. Rincheval, V., M. Lelek, ..., M.-A. Rameix-Welti. 2017. Functional organization of cytoplasmic inclusion bodies in cells infected by respiratory syncytial virus. *Nat. Commun.* 8:563.
6. Nikolic, J., R. Le Bars, ..., D. Blondel. 2017. Negri bodies are viral factories with properties of liquid organelles. *Nat. Commun.* 8:58.
7. Guseva, S., S. Milles, ..., M. Blackledge. 2020. Measles virus nucleocapsid and phosphoproteins form liquid-like phase-separated compartments that promote nucleocapsid assembly. *Sci. Adv.* 6:eaaaz7095.
8. Monette, A., M. Niu, ..., A. J. Mouland. 2020. Pan-retroviral nucleocapsid-mediated phase separation regulates genomic RNA positioning and trafficking. *Cell Rep.* 31:107520.
9. Klein, S., M. Cortese, ..., P. Chlanda. 2020. SARS-CoV-2 structure and replication characterized by in situ cryo-electron tomography. *Nat. Commun.* 11:5885.
10. Hsieh, P. K., S. C. Chang, ..., M.-F. Chang. 2005. Assembly of severe acute respiratory syndrome coronavirus RNA packaging signal into virus-like particles is nucleocapsid dependent. *J. Virol.* 79:13848–13855.
11. Iserman, C., C. A. Roden, ..., A. S. Gladfelter. 2020. Genomic RNA elements drive phase separation of the SARS-CoV-2 nucleocapsid. *Mol. Cell.* 80:1078–1091.e6.
12. Perdikari, T. M., A. C. Murthy, ..., N. L. Fawzi. 2020. SARS-CoV-2 nucleocapsid protein phase-separates with RNA and with human hnRNPs. *EMBO J.* 39:e106478.
13. Cubuk, J., J. J. Alston, ..., A. S. Holehouse. 2021. The SARS-CoV-2 nucleocapsid protein is dynamic, disordered, and phase separates with RNA. *Nat. Commun.* 12:1936.
14. Savastano, A., A. Ibáñez de Opakua, ..., M. Zweckstetter. 2020. Nucleocapsid protein of SARS-CoV-2 phase separates into RNA-rich polymerase-containing condensates. *Nat. Commun.* 11:6041.
15. Chen, H., Y. Cui, ..., J. Lou. 2020. Liquid-liquid phase separation by SARS-CoV-2 nucleocapsid protein and RNA. *Cell Res.* 30:1143–1145.
16. Choi, J. M., F. Dar, and R. V. Pappu. 2019. LASSI: a lattice model for simulating phase transitions of multivalent proteins. *PLoS Comput. Biol.* 15:e1007028.
17. Towns, J., T. Cockerill, ..., N. Wilkins-Diehr. 2014. XSEDE: accelerating scientific discovery. *Comput. Sci. Eng.* 16:62–74.
18. Stukowski, A. 2010. Visualization and analysis of atomistic simulation data with OVITO – the open visualization tool. *Model. Simul. Mater. Sci. Eng.* 18:015012.
19. Yang, D., and J. L. Leibowitz. 2015. The structure and functions of coronavirus genomic 3' and 5' ends. *Virus Res.* 206:120–133.
20. Ziv, O., J. Price, ..., E. A. Miska. 2020. The short- and long-range RNA-RNA interactome of SARS-CoV-2. *Mol. Cell.* 80:1067–1077.e5.
21. Masters, P. S. 2019. Coronavirus genomic RNA packaging. *Virology.* 537:198–207.
22. Fixman, M. 1962. Radius of gyration of polymer chains. *J. Chem. Phys.* 36:306–310.
23. Ziv, O., M. M. Gabryelska, ..., E. A. Miska. 2018. COMRADES determines in vivo RNA structures and interactions. *Nat. Methods.* 15:785–788.
24. Cadena-Nava, R. D., M. Comas-Garcia, ..., W. M. Gelbart. 2012. Self-assembly of viral capsid protein and RNA molecules of different sizes: requirement for a specific high protein/RNA mass ratio. *J. Virol.* 86:3318–3326.
25. Espinosa, J. R., J. A. Joseph, ..., R. Collepardo-Guevara. 2020. Liquid network connectivity regulates the stability and composition of biomolecular condensates with many components. *Proc. Natl. Acad. Sci. USA.* 117:13238–13247.
26. Banani, S. F., A. M. Rice, ..., M. K. Rosen. 2016. Compositional control of phase-separated cellular bodies. *Cell.* 166:651–663.
27. Kim, T. H., B. Tsang, ..., J. D. Forman-Kay. 2019. Phospho-dependent phase separation of FMRP and CAPRIN1 recapitulates regulation of translation and deadenylation. *Science.* 365:825–829.
28. Flory, P. J. 1942. Thermodynamics of high polymer solutions. *J. Chem. Phys.* 10:51–61.
29. Yamazaki, T., S. Souquere, ..., T. Hirose. 2018. Functional domains of NEAT1 architectural lncRNA induce paraspeckle assembly through phase separation. *Mol. Cell.* 70:1038–1053.e7.
30. Hirose, T., T. Yamazaki, and S. Nakagawa. 2019. Molecular anatomy of the architectural NEAT1 noncoding RNA: the domains, interactors, and biogenesis pathway required to build phase-separated nuclear paraspeckles. *Wiley Interdiscip. Rev. RNA.* 10:e1545.

**Biophysical Journal, Volume 120**

**Supplemental information**

**Role of spatial patterning of N-protein interactions in SARS-CoV-2 genome packaging**

**Ian Seim, Christine A. Roden, and Amy S. Gladfelter**

## Supplemental Material for

### Role of spatial patterning of N-protein interactions in SARS-CoV-2 genome packaging

Ian Seim<sup>1,2,3</sup>, Christine A. Roden<sup>1</sup>, and Amy S. Gladfelter<sup>1\*</sup>

<sup>1</sup>Department of Biology, University of North Carolina at Chapel Hill, Chapel Hill, NC, USA

<sup>2</sup>Curriculum in Bioinformatics and Computational Biology, University of North Carolina at Chapel Hill, Chapel Hill, NC, USA

<sup>3</sup>Department of Applied Physical Sciences, University of North Carolina at Chapel Hill, Chapel Hill, NC, USA

\*corresponding author: [amyglad@unc.edu](mailto:amyglad@unc.edu)

#### 6-bead RNA with N-protein

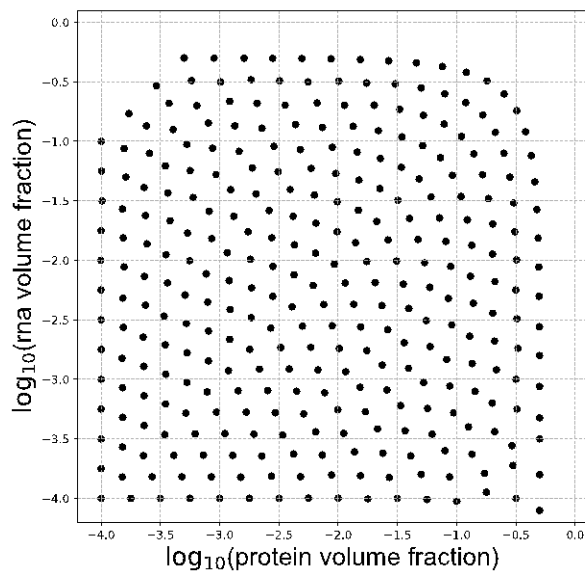

#### gRNA with N-protein

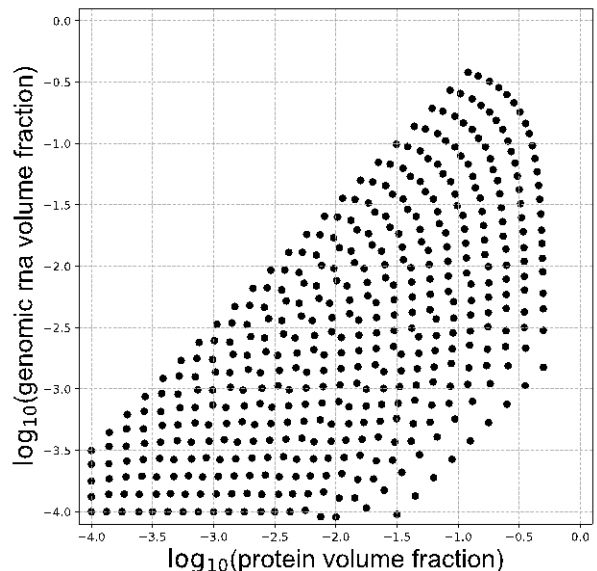

**Figure S1: (protein, gRNA) volume fractions used in ternary simulations.** 4 simulations were run at each point for respective systems as described in methods. Specifically, a given point represents a certain volume fraction of both the protein and RNA components in a system. The total number of chains for each point is set as specified in the methods, and the number of each protein and RNA chain is set to satisfy the corresponding volume fractions at each point.



N-protein  $\updownarrow$  = isotropic binding  
 $\updownarrow$  = anisotropic binding

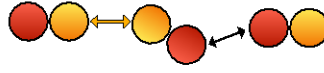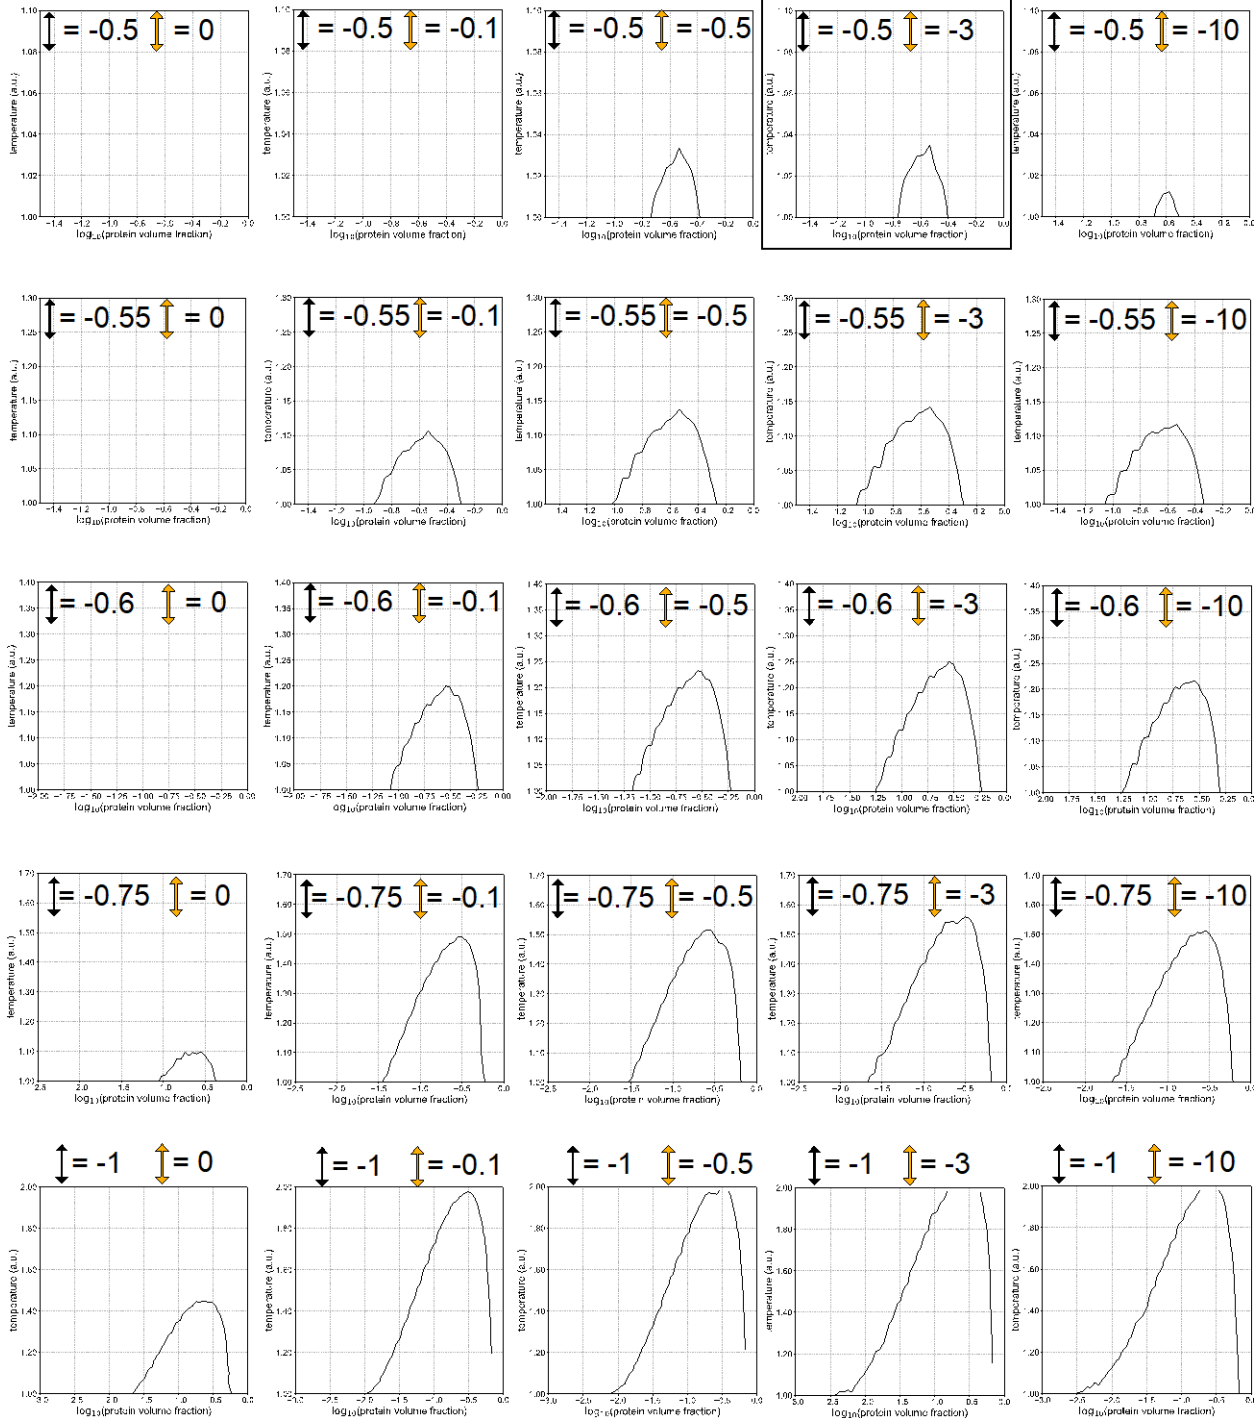

**Figure S2: Sweeps over protein-protein interaction energies for the protein-only system.** An independent set of simulations was performed to generate phase diagrams in each panel shown. Along rows, the isotropic energy is fixed and the anisotropic energy changes, and across columns the anisotropic energy is fixed and the isotropic energy changes. The default N-protein energies are indicated by the black rectangle.

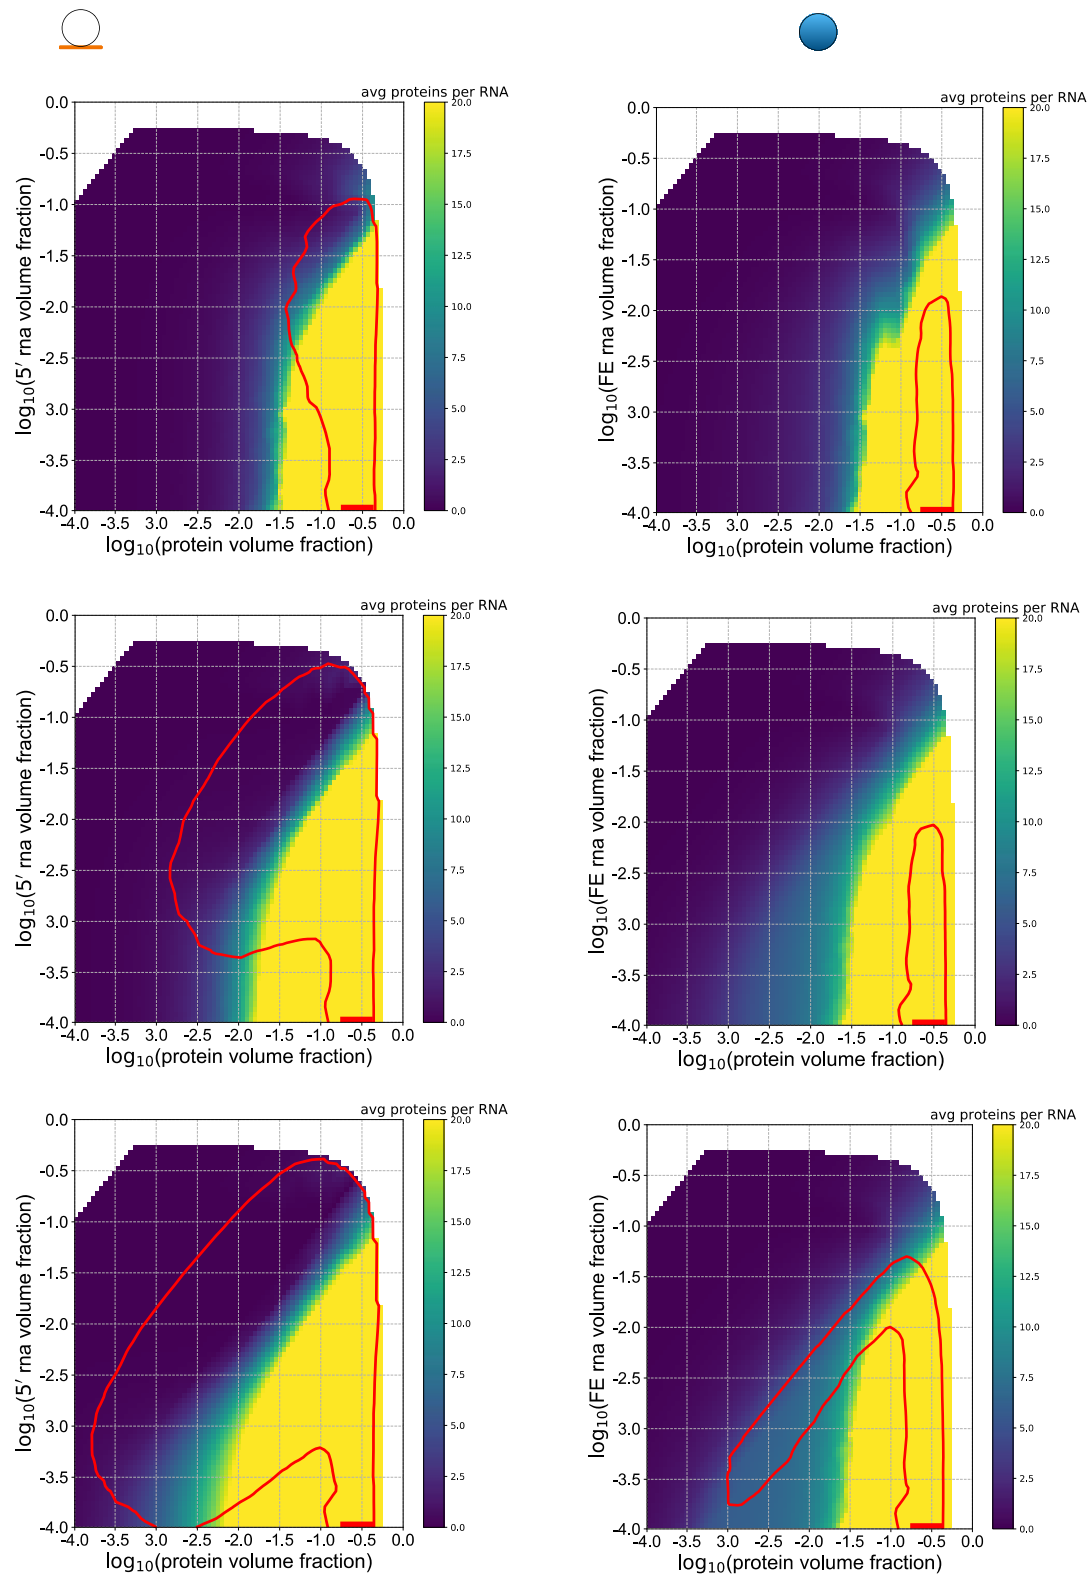

**Figure S3: Sweeps over interaction energies between N-protein and 5' end RNA and N-protein and FE RNA.** For default N-protein binding energies, the isotropic binding between N-protein and 5' end RNA is changed along the first column, and the anisotropic binding between N-protein and FE RNA is changed along the second column.

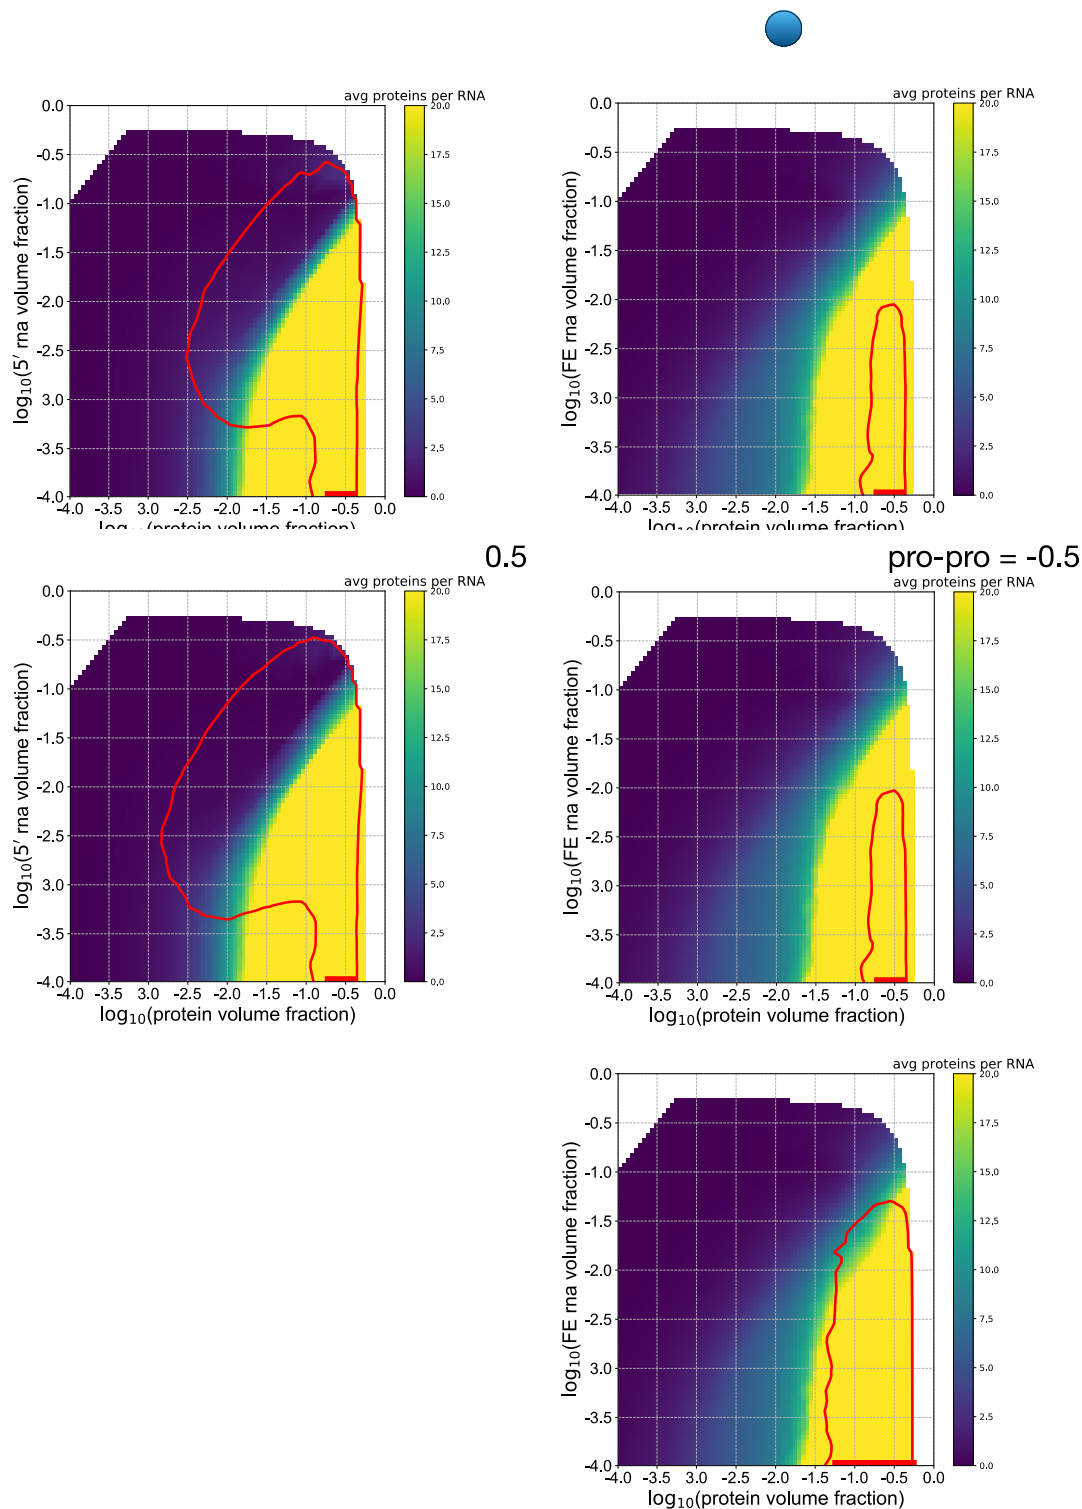

**Figure S4: Results for altered RNA-RNA repulsion energies and protein-protein isotropic interaction energies.** The first row demonstrates the effect of a doubled RNA-RNA isotropic repulsion, with all other parameters set to default values. The second row shows results for default values of all parameters. The third row shows the effect of incorporating N-protein with a higher isotropic self-binding energy.

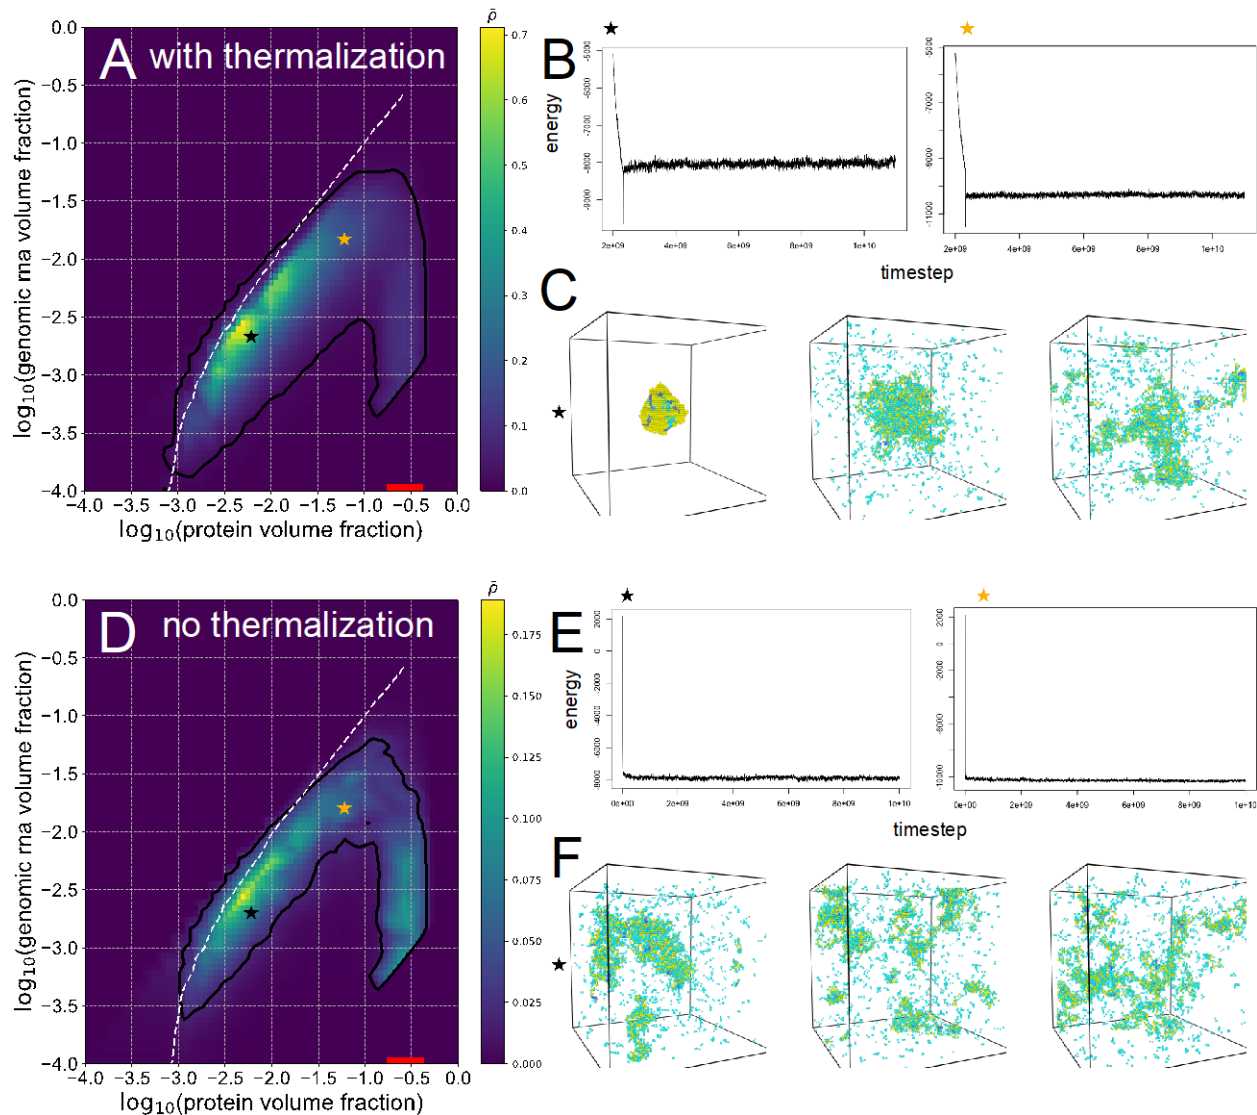

**Figure S5: Comparison of energies and system conformational states with and without thermalization for the default N-protein-gRNA parameters.** (A) Phase diagram for a system run with 1e9 steps of thermalization. (B) Total energy versus timestep plots for two simulations corresponding to black and orange stars in (A). (C) Snapshots of the black star simulation at the beginning during simulation, halfway through, and at the end of the simulation. (D) Phase diagram for the system run with no thermalization. (E) Total energy versus timestep plots for two simulations corresponding to black and orange stars in (D). (F) Snapshots of the black star simulation at the beginning of the simulation, halfway through, and at the end of the simulation.



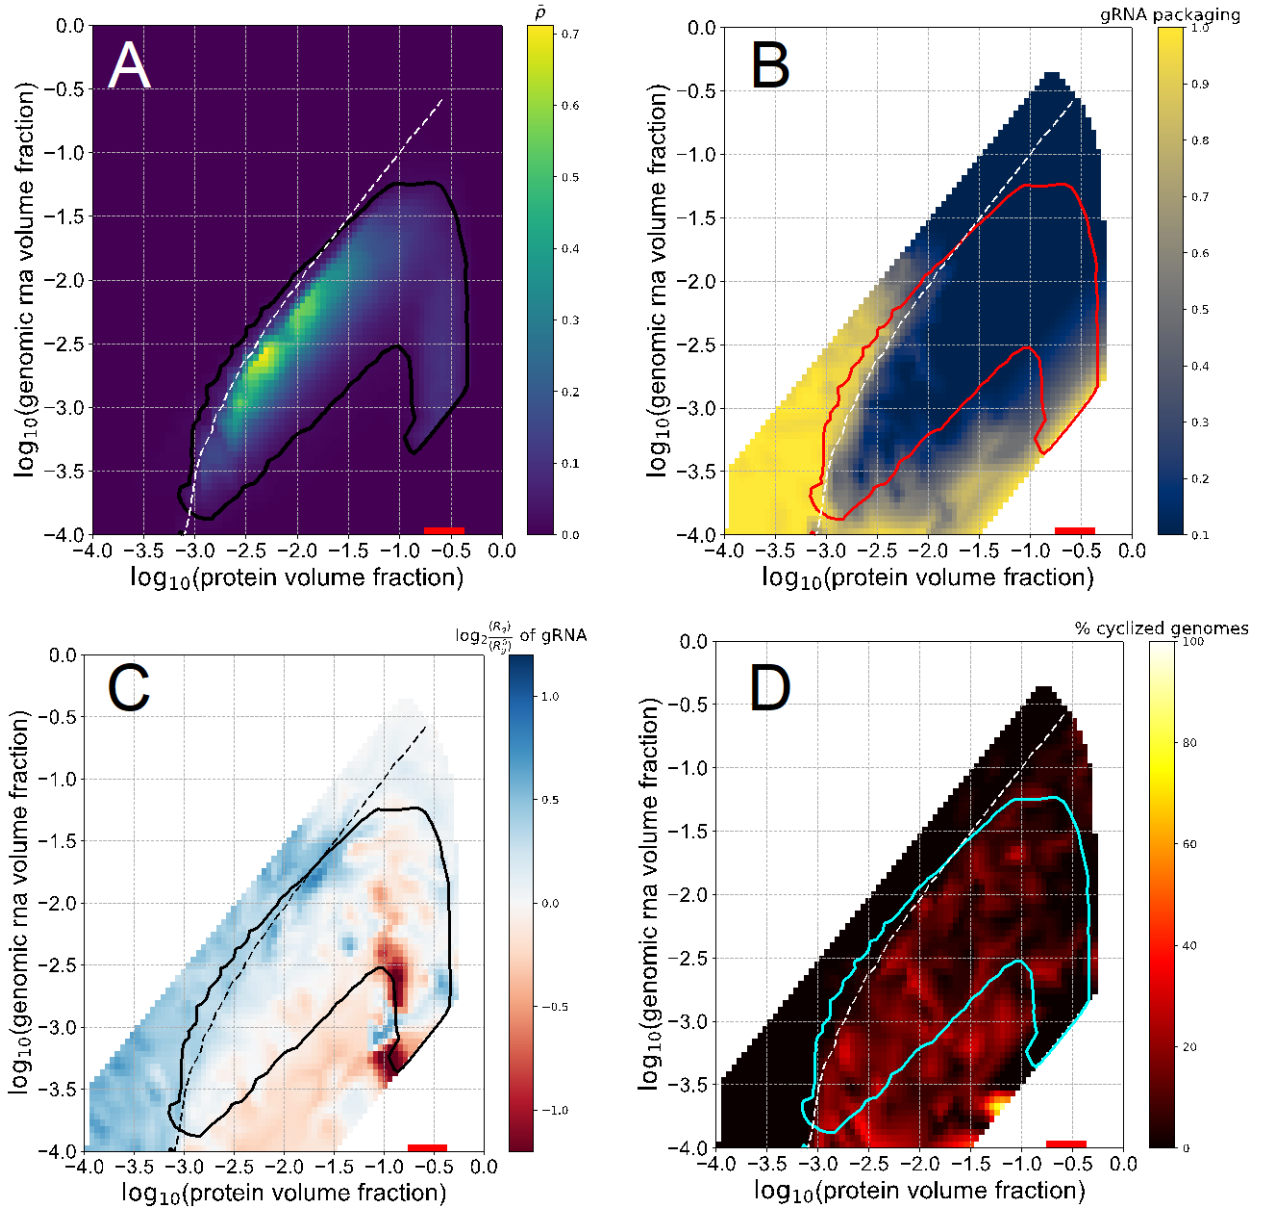

**Figure S6: Phase behavior of the default N-protein with gRNA system with  $1e9$  steps thermalization at beginning of simulation.** (A) Heatmap shows  $\bar{\rho}$  calculated for N-protein – N-protein interactions only, as described in methods. The black line is the contour drawn at  $\bar{\rho} = 0.02$ , and the white line denotes the bulk volume fractions at which an equal volume fraction of protein is bound to each gRNA molecule, on average. (B) Phase envelope in red overlaid on the single packaging metric. (C) Phase envelope in black overlaid on the fold change in the radius of gyration relative to a system with no interactions. (D) Phase envelope in cyan overlaid on the percentage of cyclized genomes.

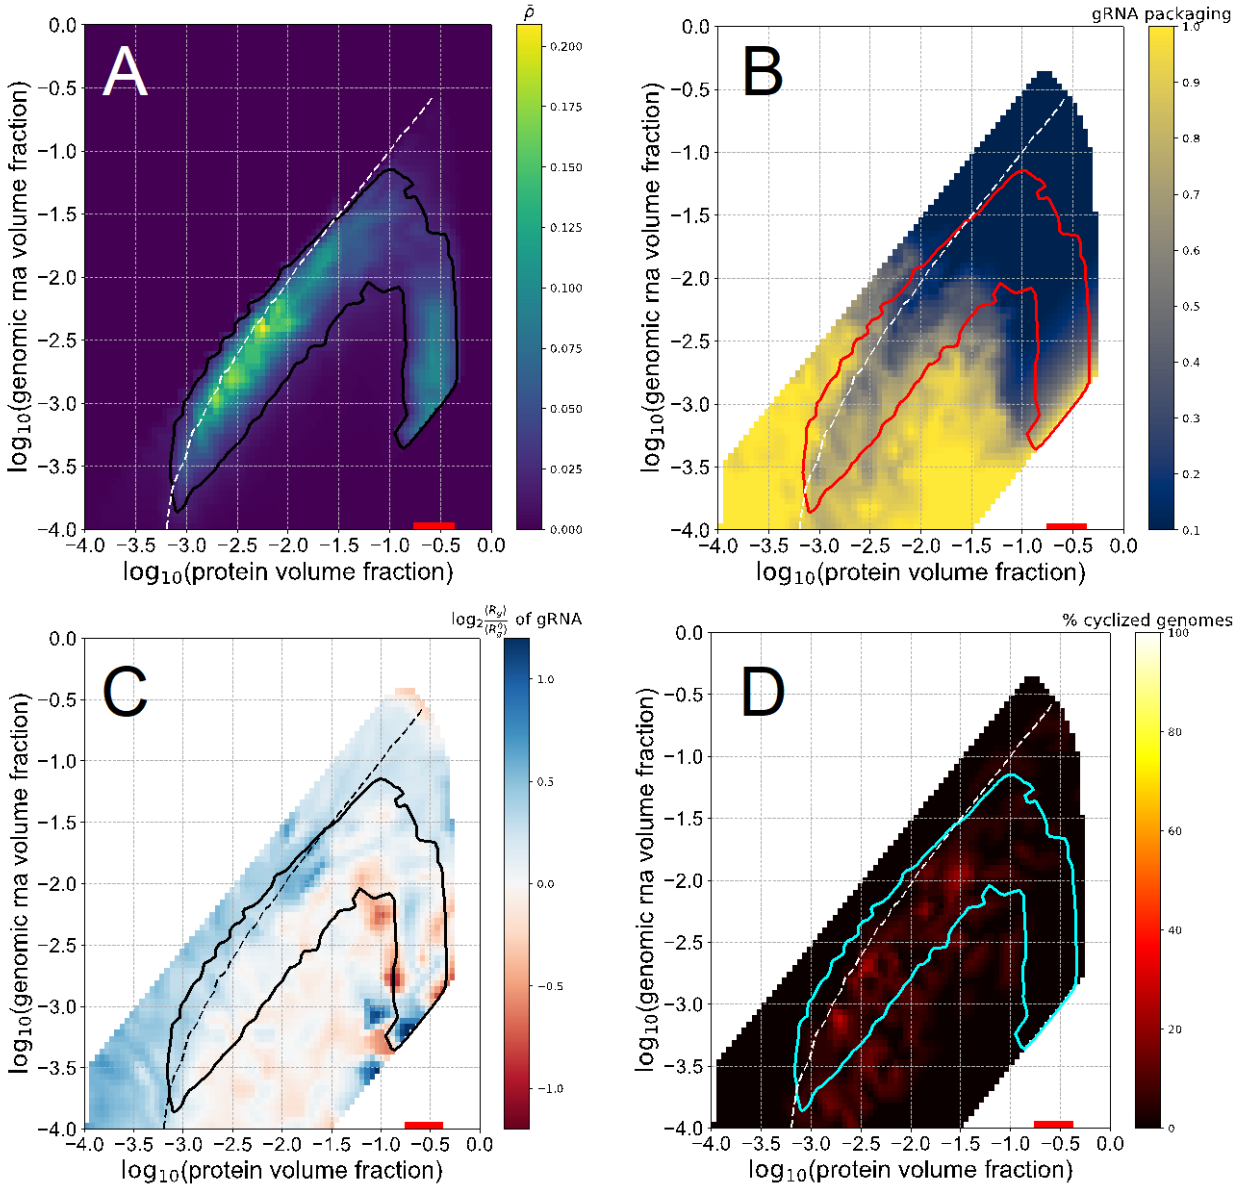

**Figure S7: Phase behavior of N-protein with gRNA with isotropic binding energy between N-protein and 5' end RNA in the gRNA increased to -2. (A)-(D) Related to panels in Fig. S6.**

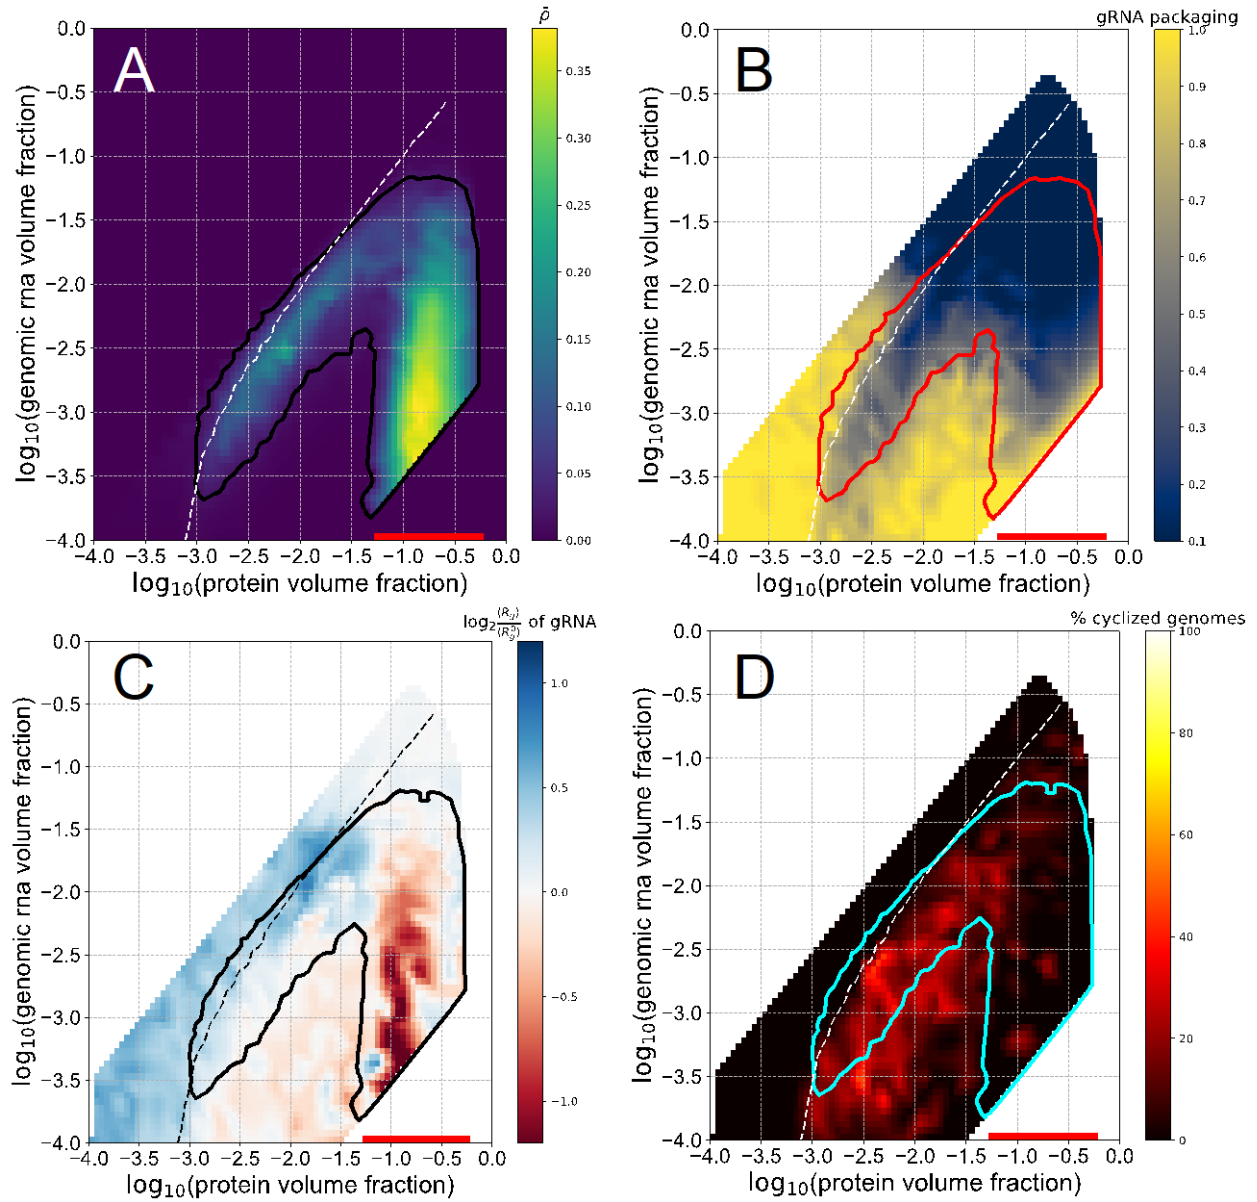

**Figure S8: Phase behavior of the N-protein with gRNA system with N-protein – N-protein isotropic interactions increased to -0.6. (A)-(D) Related to panels in Fig. S6.**

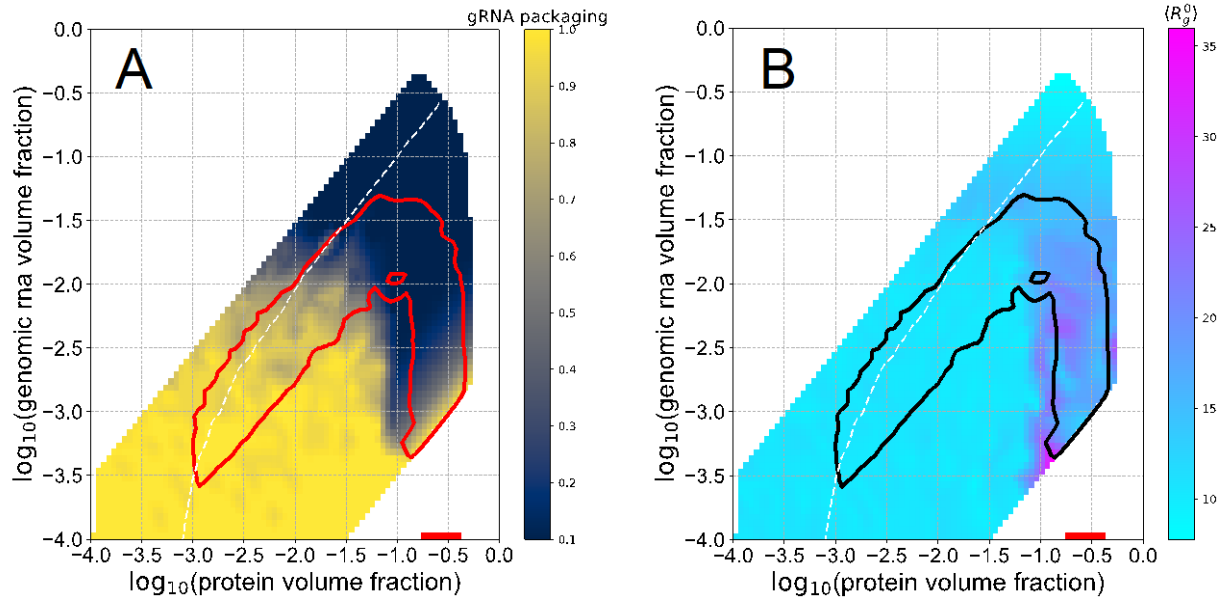

**Figure S9: gRNA packaging and radius of gyration for simulations with no interaction energies.** The only interactions among particles are excluded volume such that only one bead can occupy a lattice site at a given time.

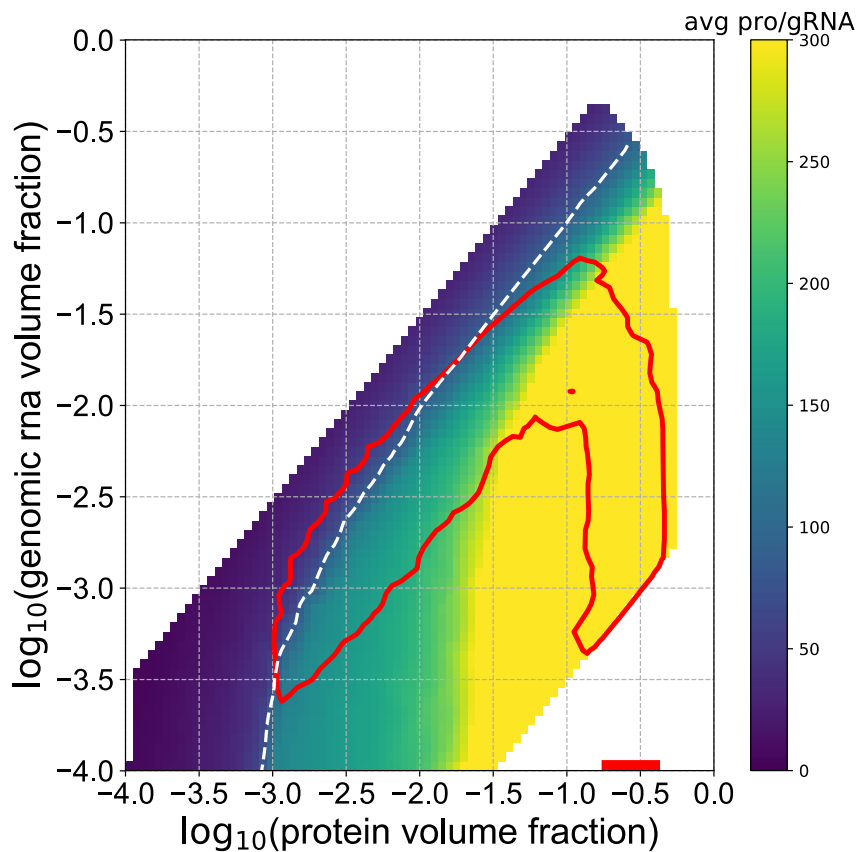

**Figure S10: Average number of N-proteins bound to each gRNA for the WT system.** Phase envelope is drawn in red. The heatmaps indicate the average number of protein chains per gRNA chain for each cluster identified in each simulation. If more than one gRNA chain is in a cluster, the ratio of protein chains to gRNA chains within that cluster is reported.
